# Supplementary material for: New pleiotropic effects of eliminating a rare tRNA from Streptomyces coelicolor, revealed by combined proteomic and transcriptomic analysis of liquid cultures
Source: PubMed Central journal article supplement (PMC2000904; doi:10.1186/1471-2164-8-261), 2007-08-02
Supplement: 1471-2164-8-261-S1.pdf [file 1471-2164-8-261-S1.pdf]

Additional file 1.

Transcript abundance profiles for all 74 genes identified as being differentially expressed between M600 and M600  $\Delta b/dA$  using DNA microarrays.

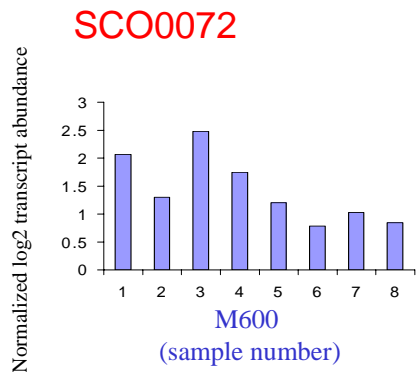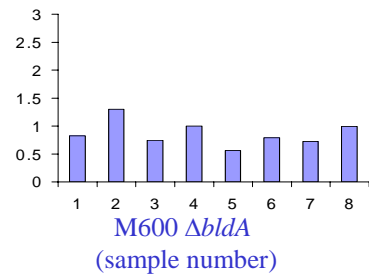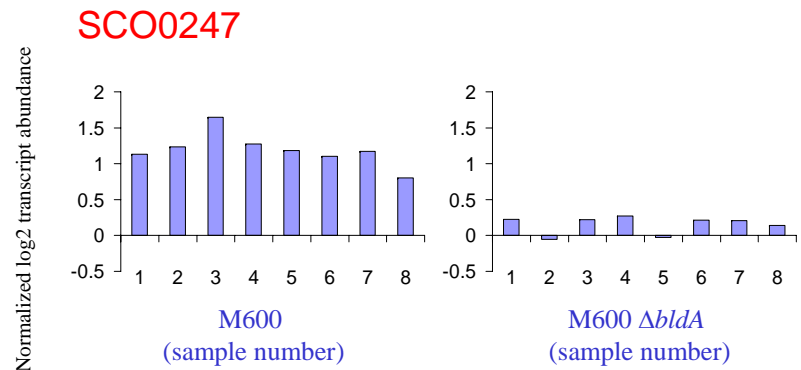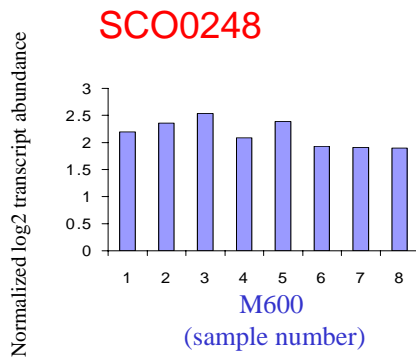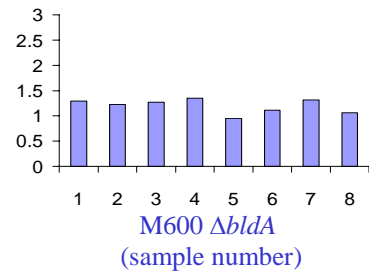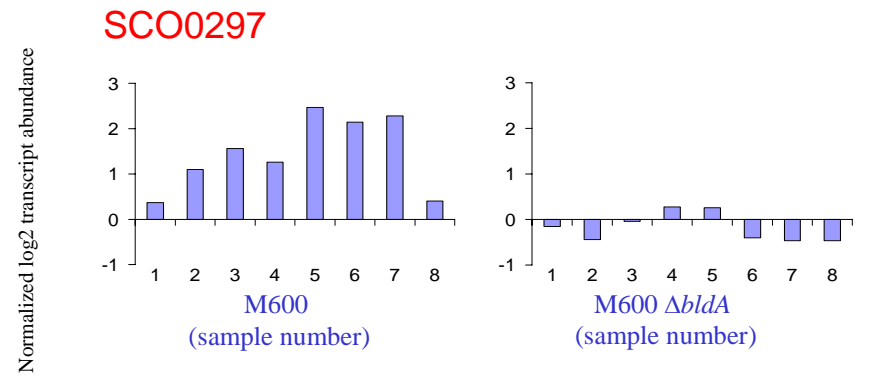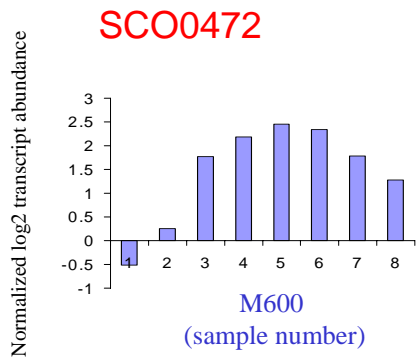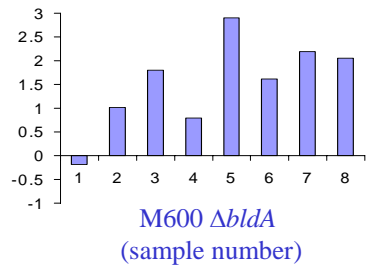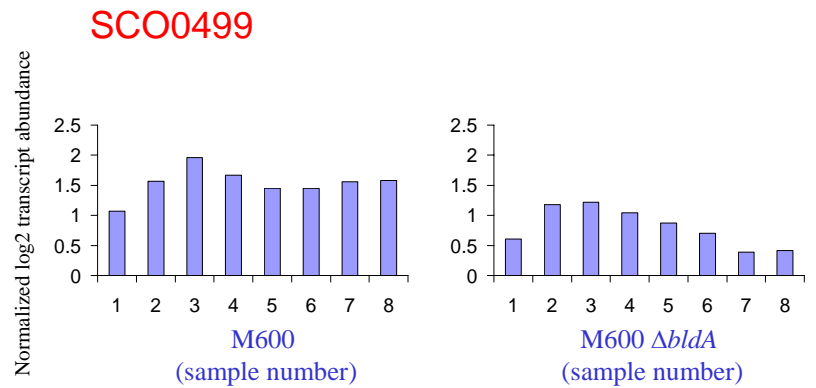

Profiles are the average of triplicate experiments

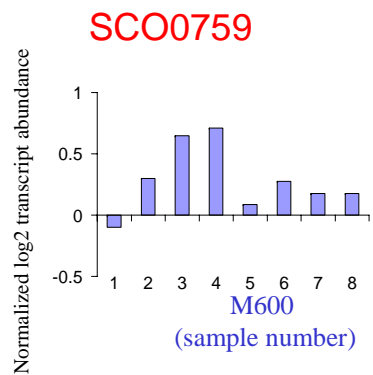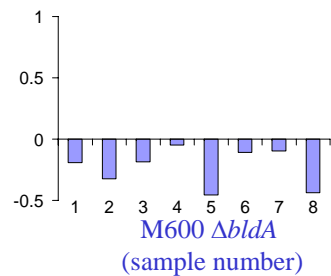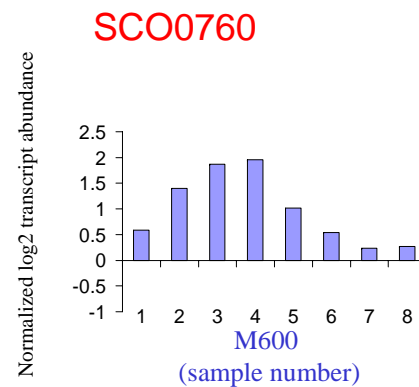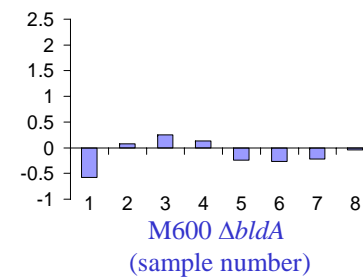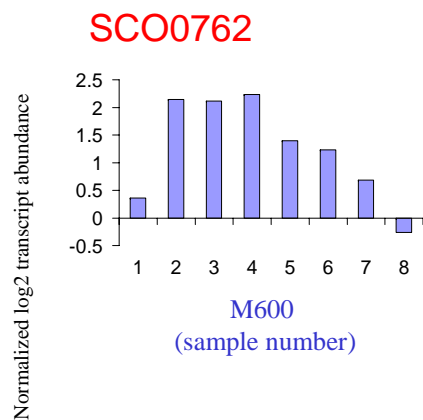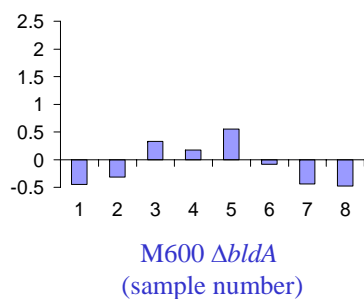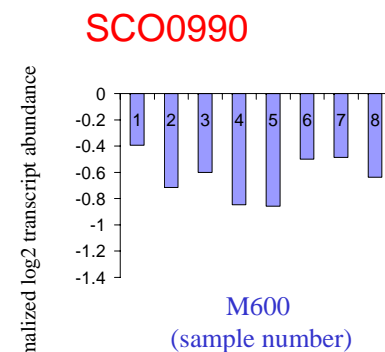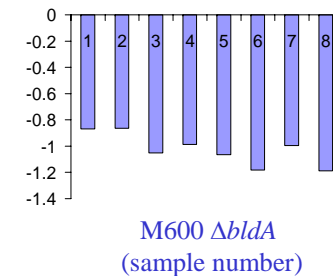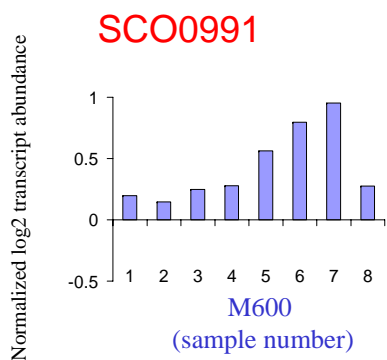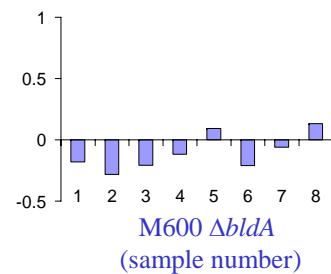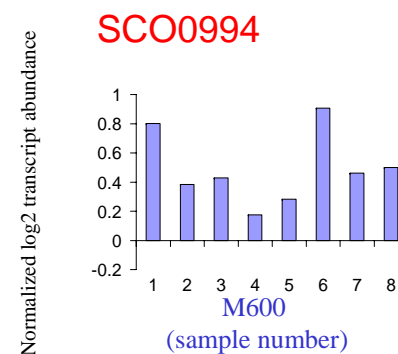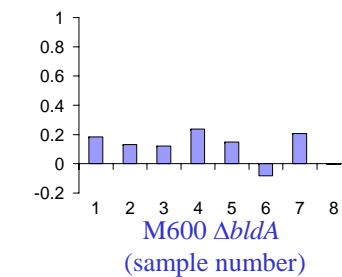

Profiles are the average of triplicate experiments

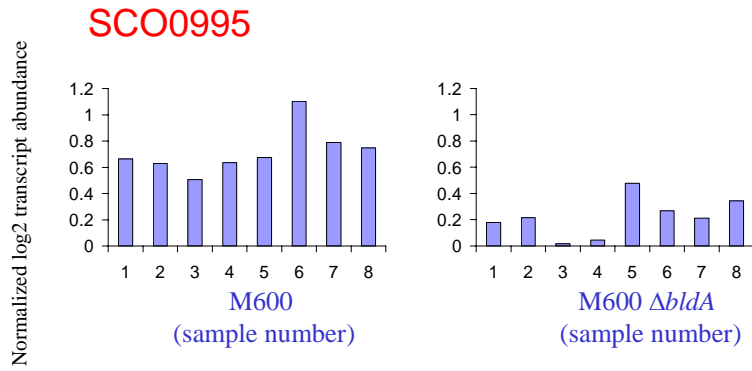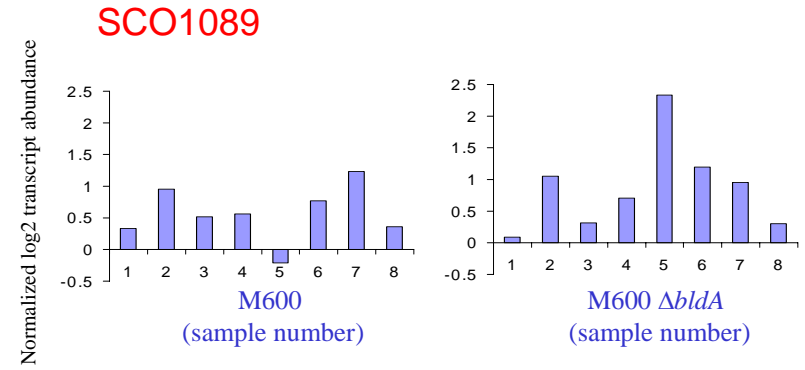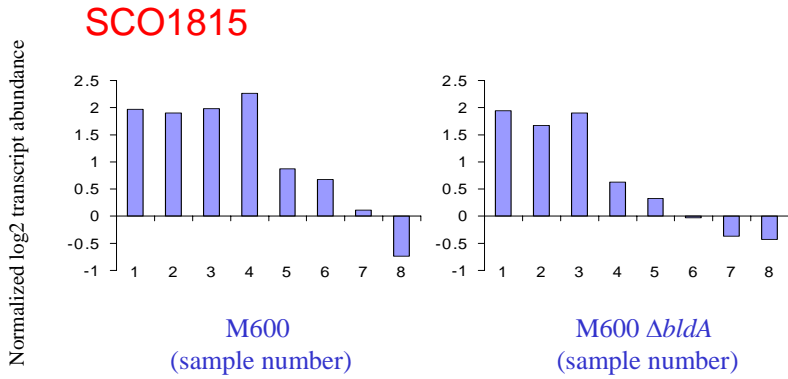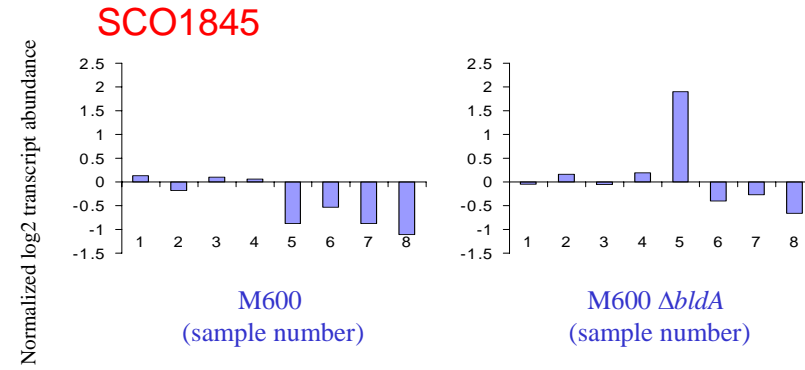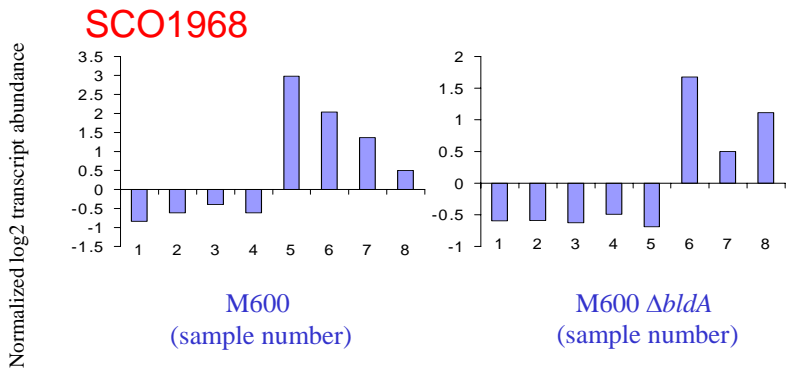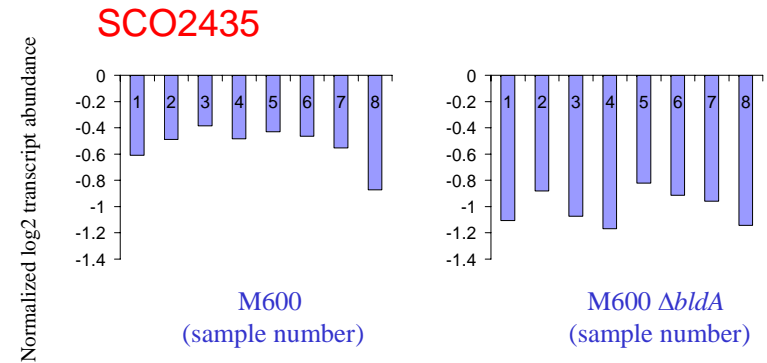

Profiles are the average of triplicate experiments

### SCO3088

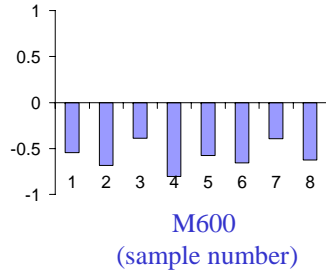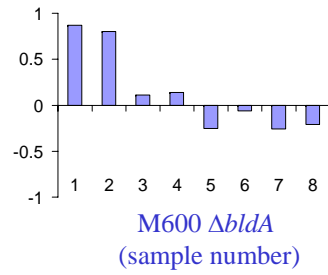

### SCO3285

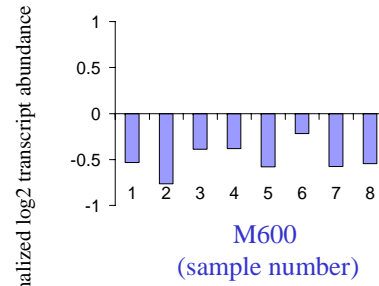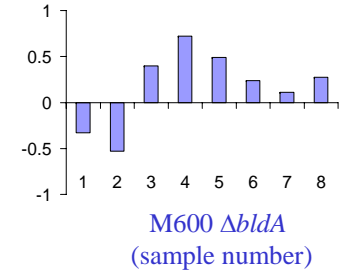

### SCO3286

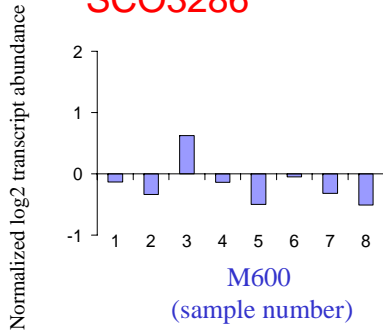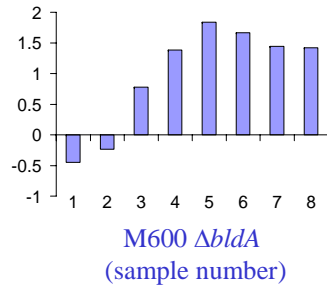

### SCO3428

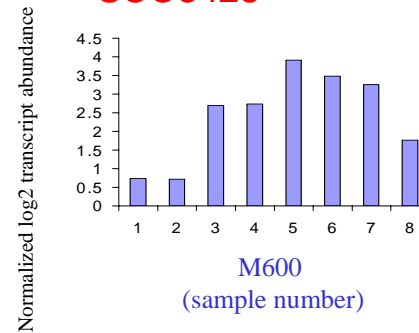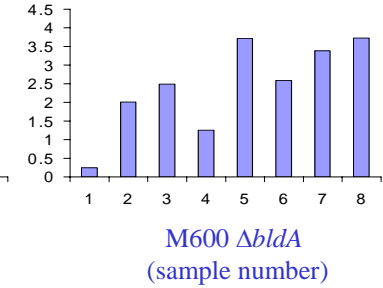

### SCO3608

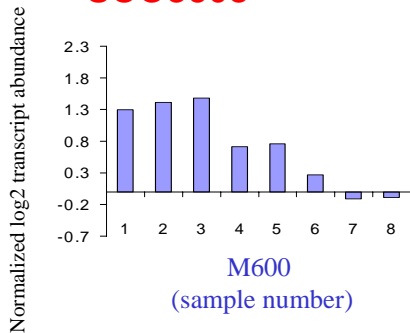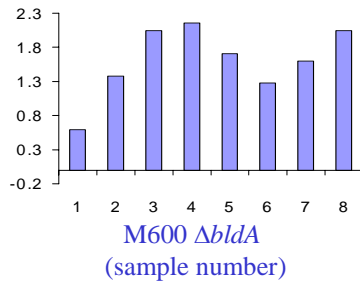

### SCO3717

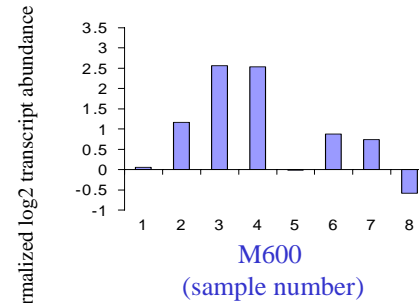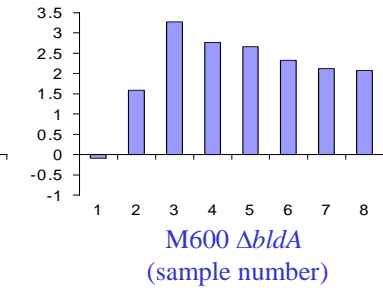

Profiles are the average of triplicate experiments

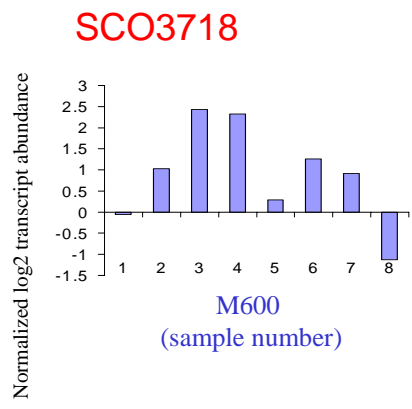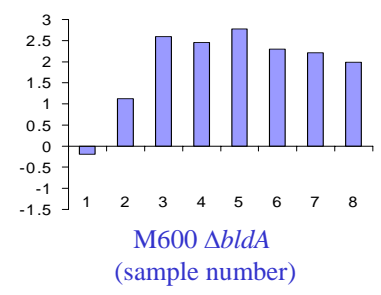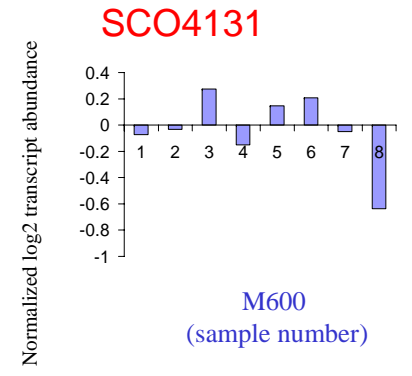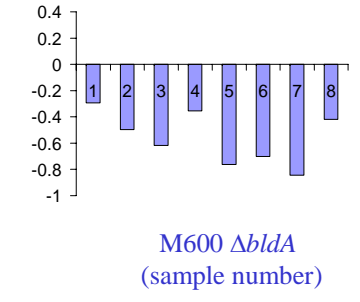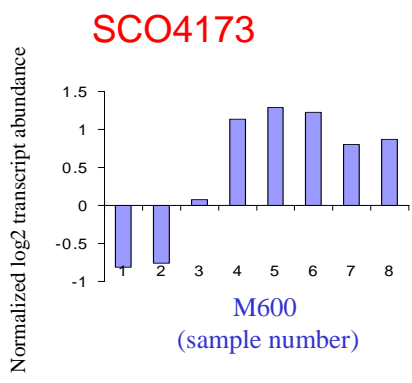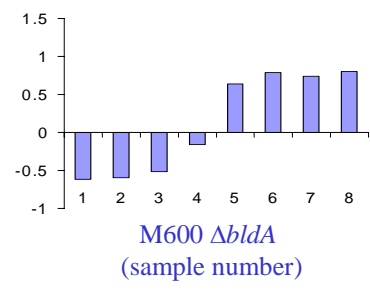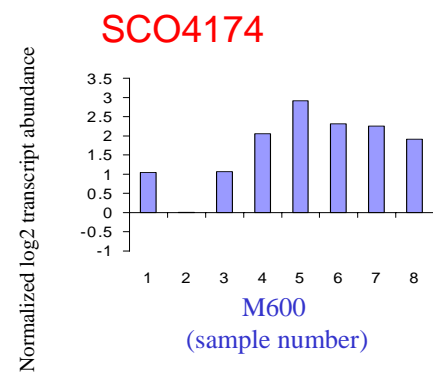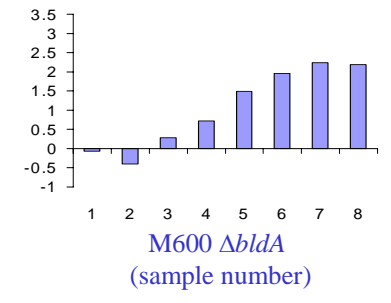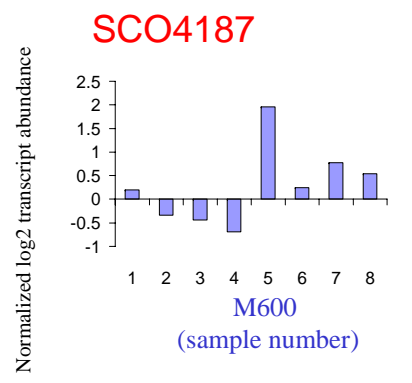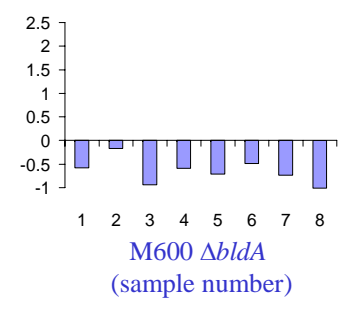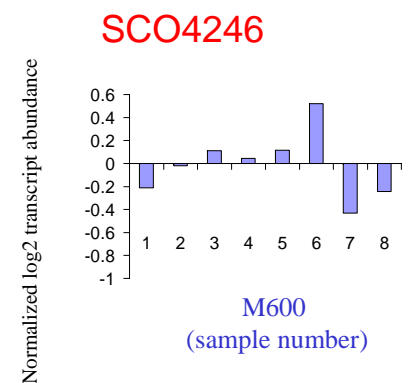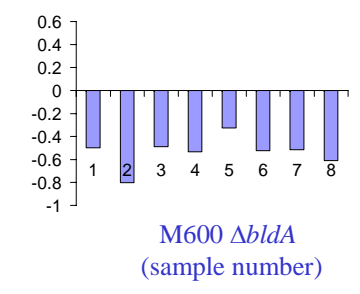

Profiles are the average of triplicate experiments

Normalized log<sub>2</sub> transcript abundance

**SCO4252**

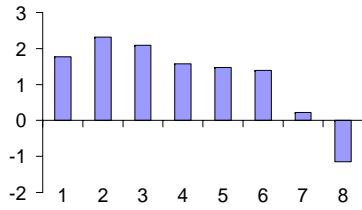

M600  
(sample number)

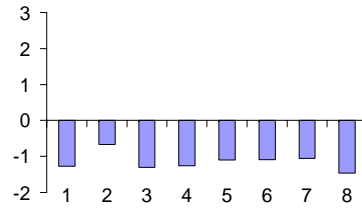

M600  $\Delta bldA$   
(sample number)

Normalized log<sub>2</sub> transcript abundance

**SCO4253**

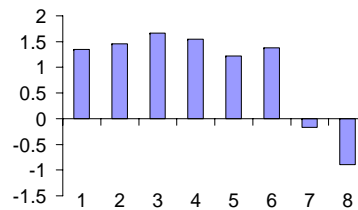

M600  
(sample number)

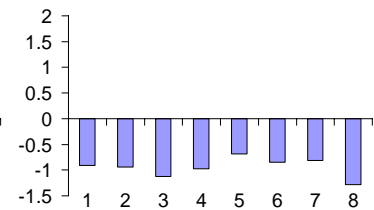

M600  $\Delta bldA$   
(sample number)

Normalized log<sub>2</sub> transcript abundance

**SCO4256**

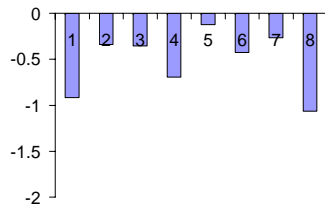

M600  
(sample number)

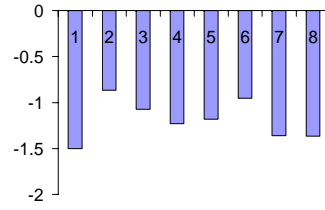

M600  $\Delta bldA$   
(sample number)

Normalized log<sub>2</sub> transcript abundance

**SCO4262**

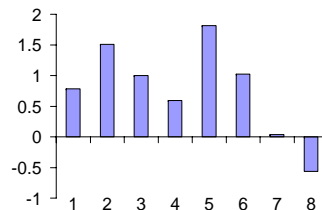

M600  
(sample number)

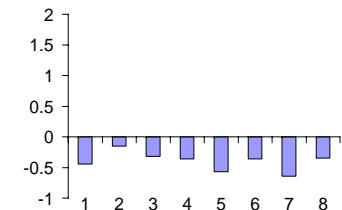

M600  $\Delta bldA$   
(sample number)

Normalized log<sub>2</sub> transcript abundance

**SCO4295**

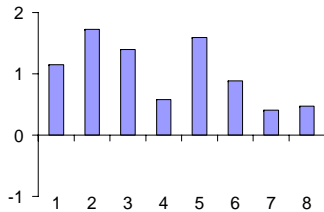

M600  
(sample number)

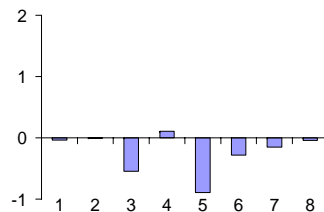

M600  $\Delta bldA$   
(sample number)

Normalized log<sub>2</sub> transcript abundance

**SCO4442**

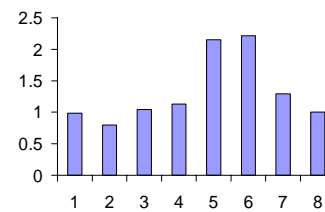

M600  
(sample number)

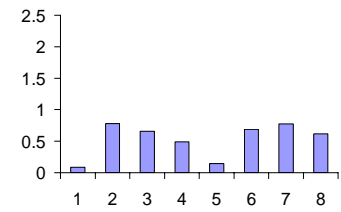

M600  $\Delta bldA$   
(sample number)

Profiles are the average of triplicate experiments

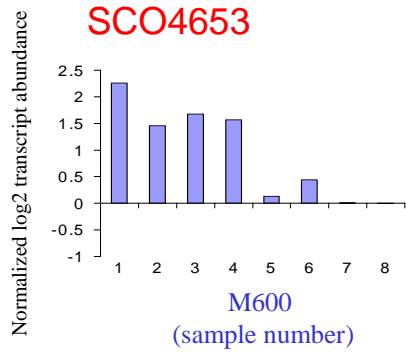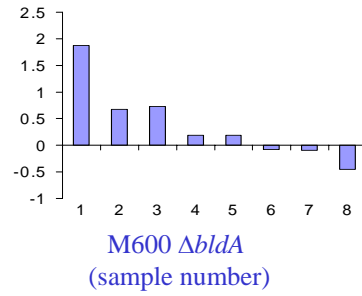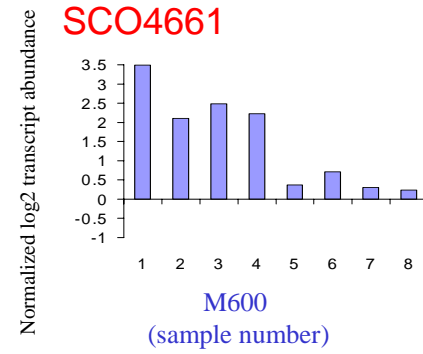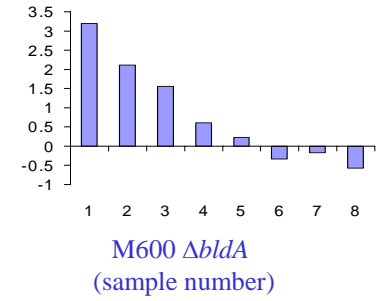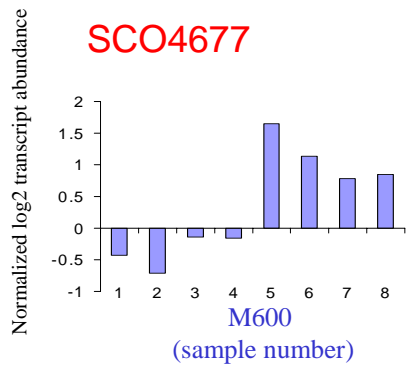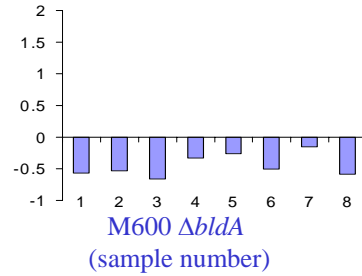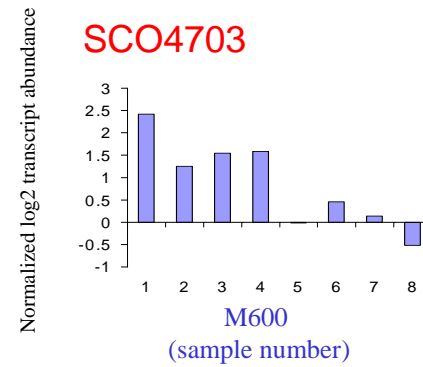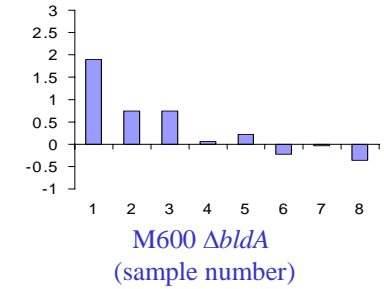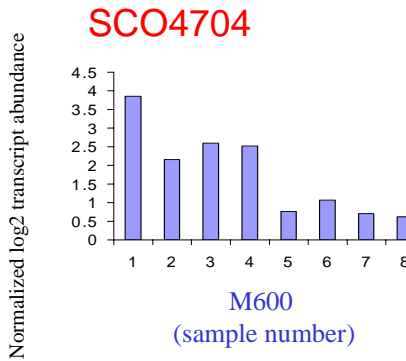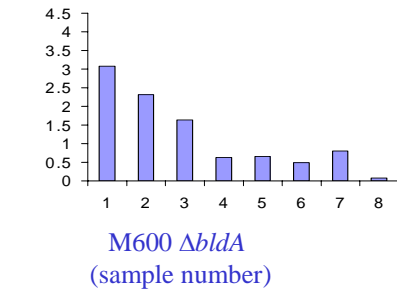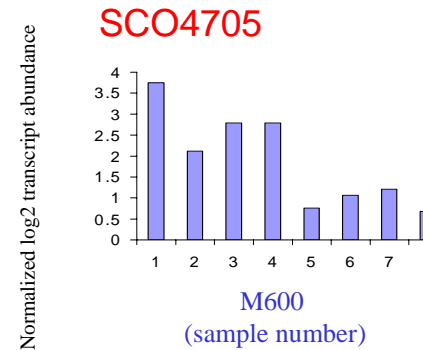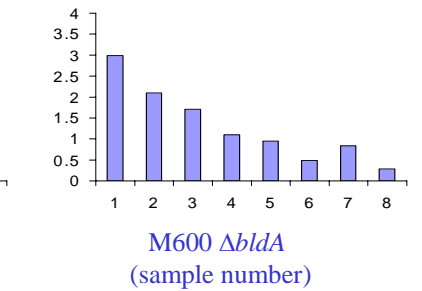

Profiles are the average of triplicate experiments



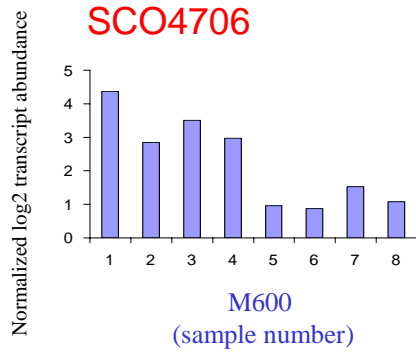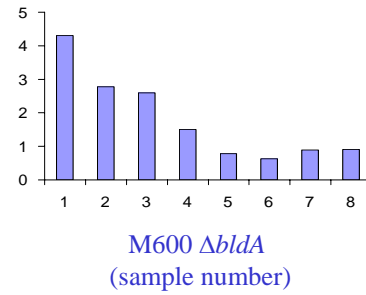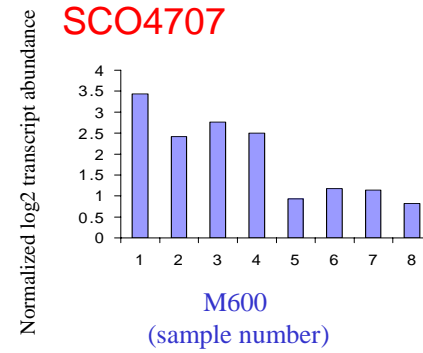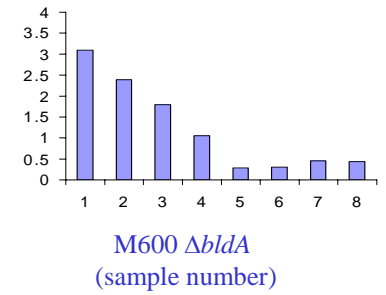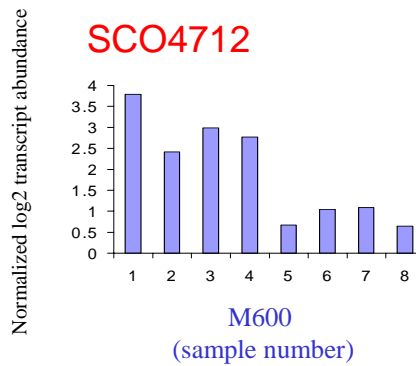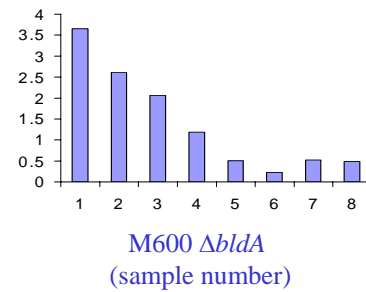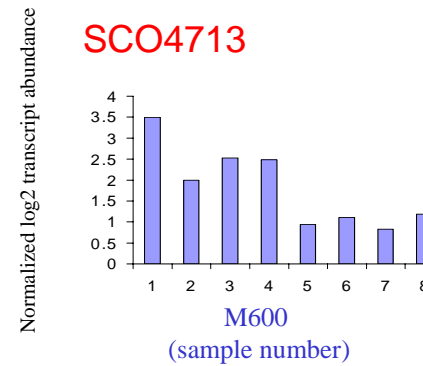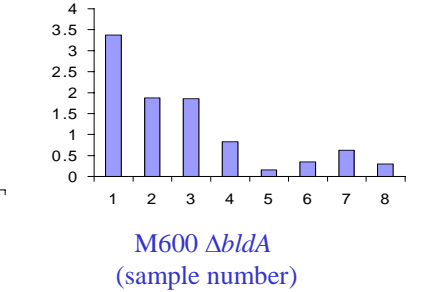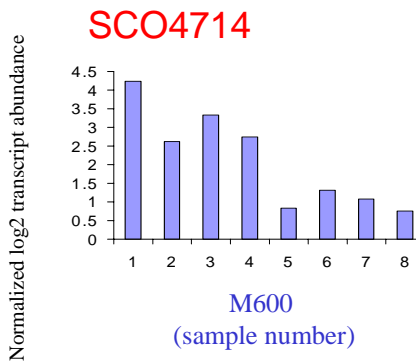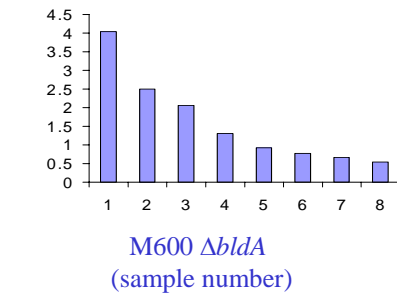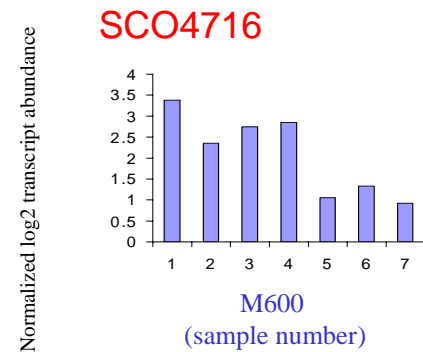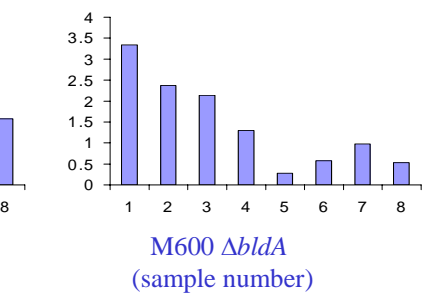

Profiles are the average of triplicate experiments

Normalized log<sub>2</sub> transcript abundance

**SCO4717**

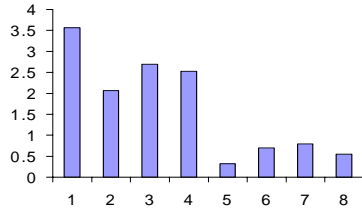

M600  
(sample number)

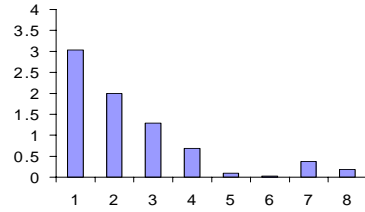

M600  $\Delta bldA$   
(sample number)

Normalized log<sub>2</sub> transcript abundance

**SCO4718**

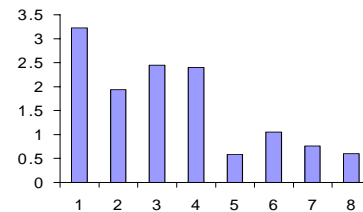

M600  
(sample number)

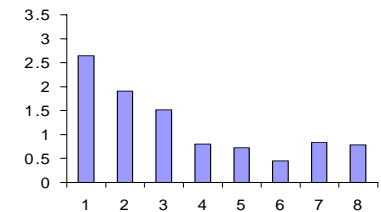

M600  $\Delta bldA$   
(sample number)

Normalized log<sub>2</sub> transcript abundance

**SCO4719**

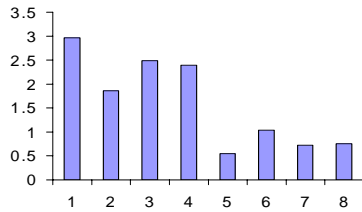

M600  
(sample number)

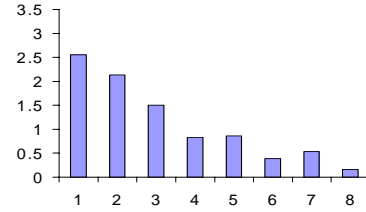

M600  $\Delta bldA$   
(sample number)

Normalized log<sub>2</sub> transcript abundance

**SCO4994**

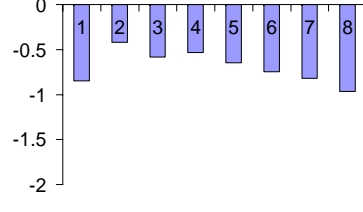

M600  
(sample number)

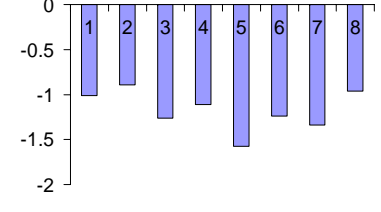

M600  $\Delta bldA$   
(sample number)

Normalized log<sub>2</sub> transcript abundance

**SCO5013**

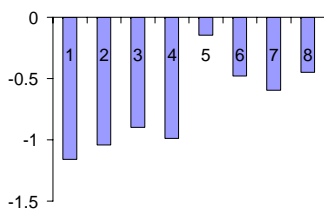

M600  
(sample number)

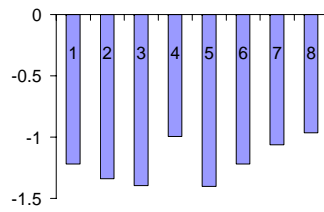

M600  $\Delta bldA$   
(sample number)

Normalized log<sub>2</sub> transcript abundance

**SCO5073**

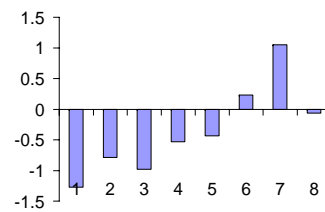

M600  
(sample number)

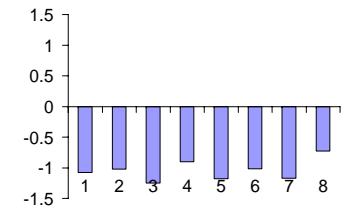

M600  $\Delta bldA$   
(sample number)

Profiles are the average of triplicate experiments

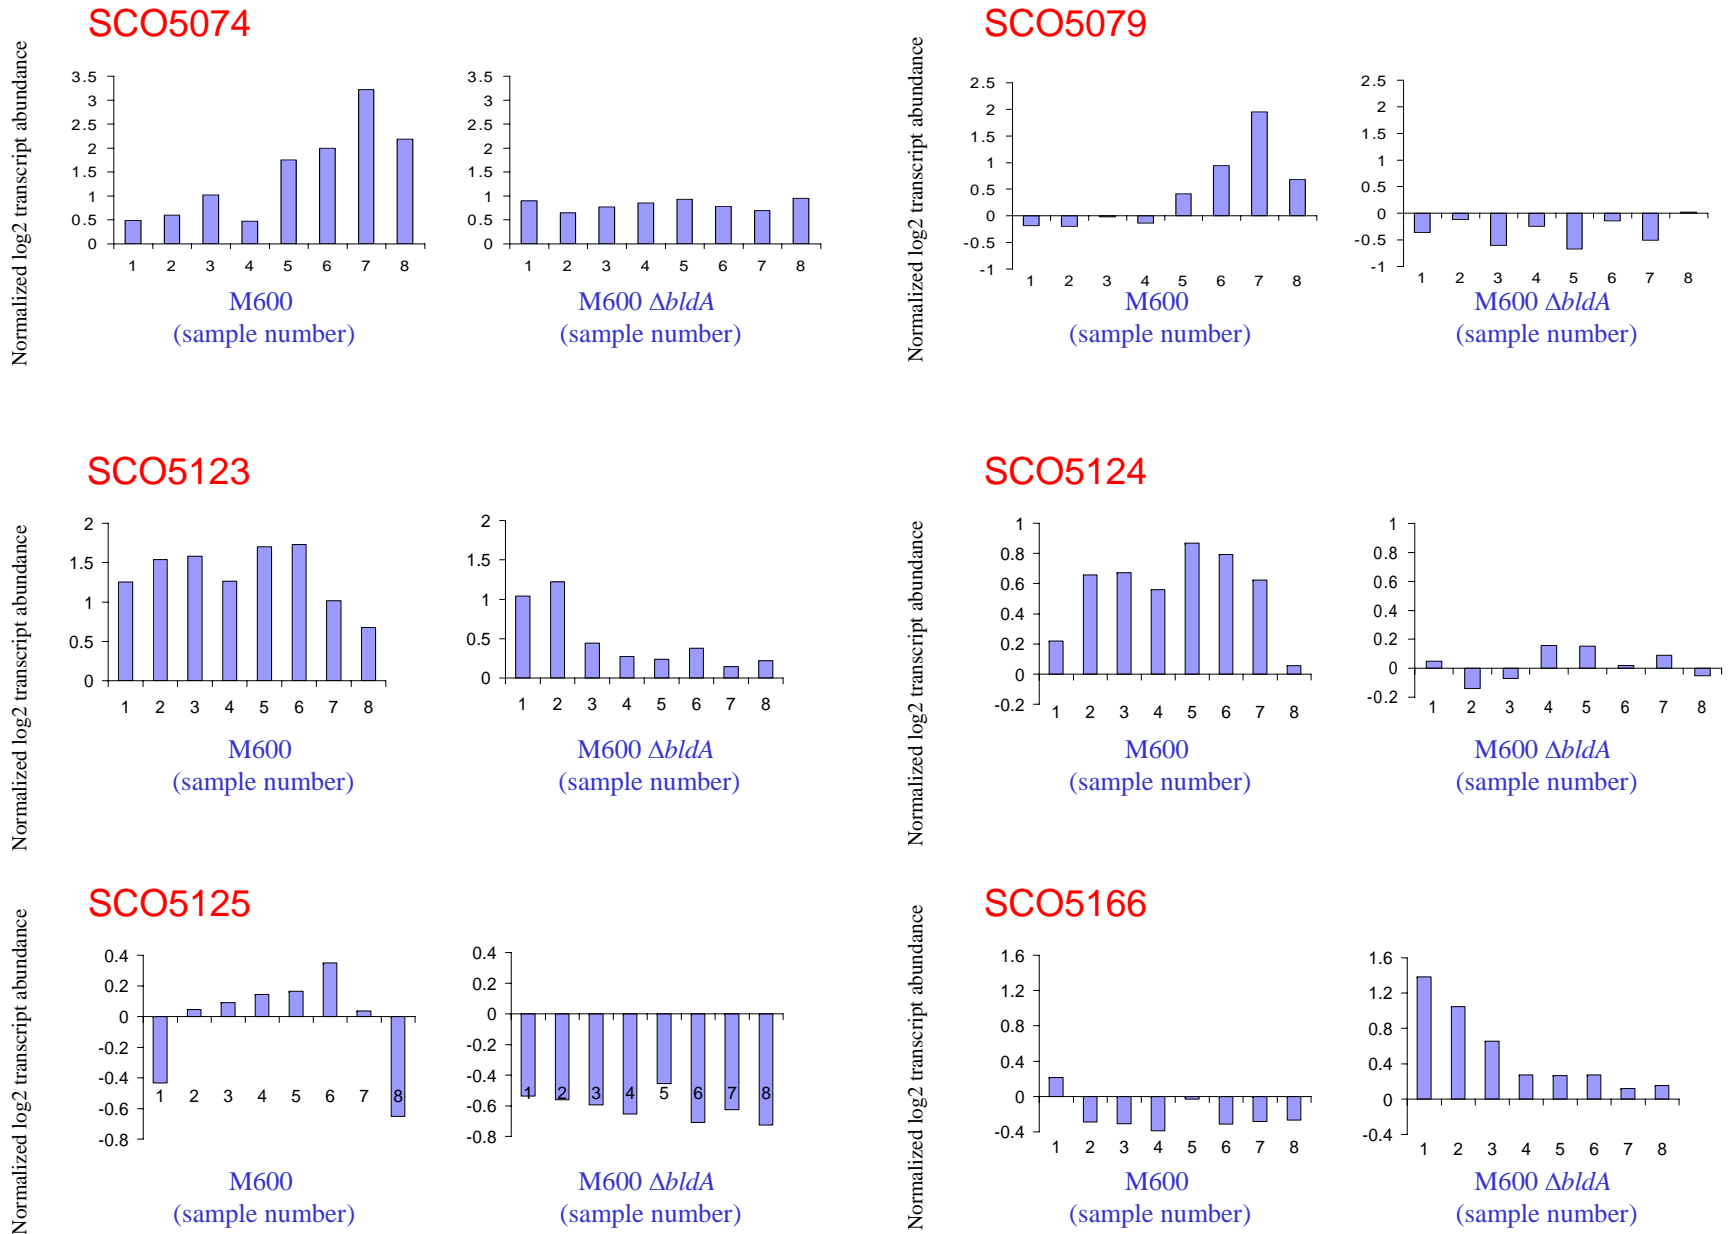

Profiles are the average of triplicate experiments

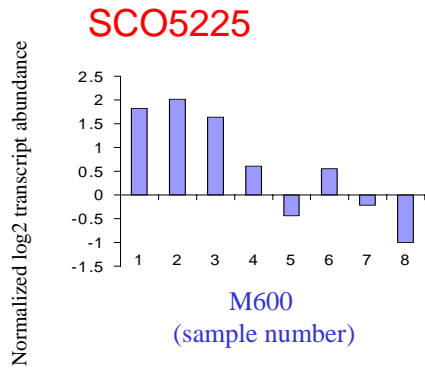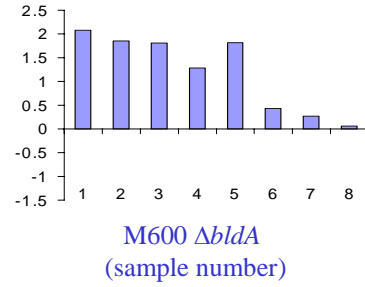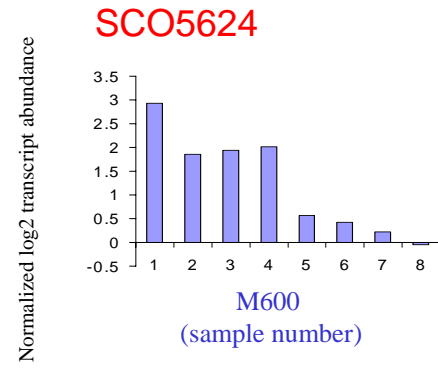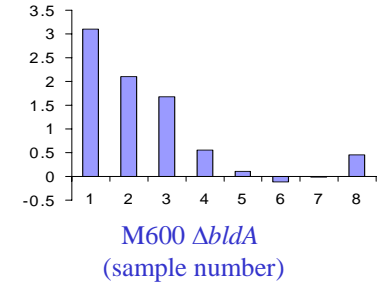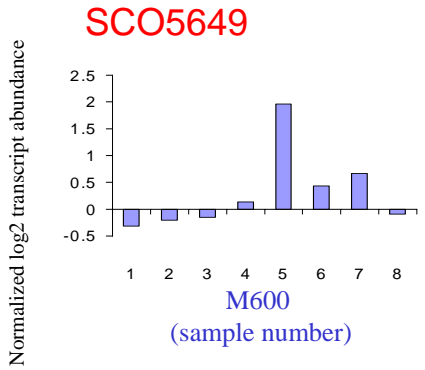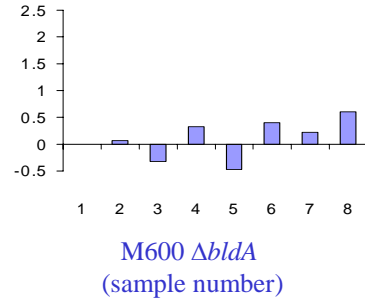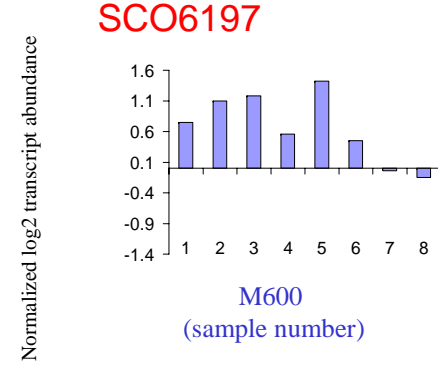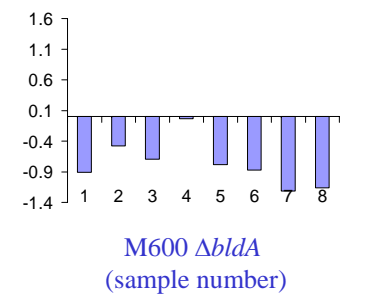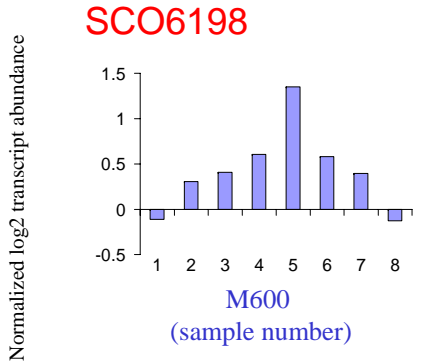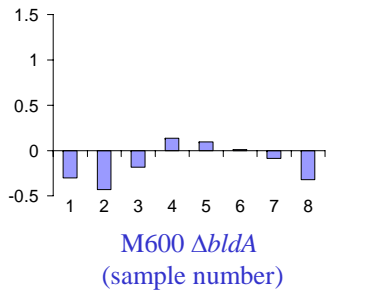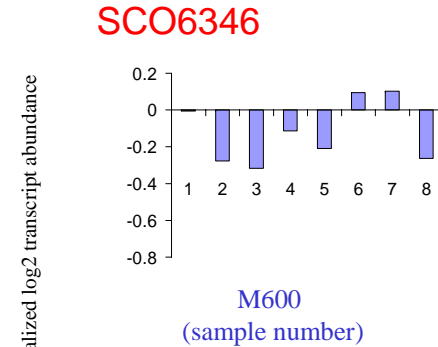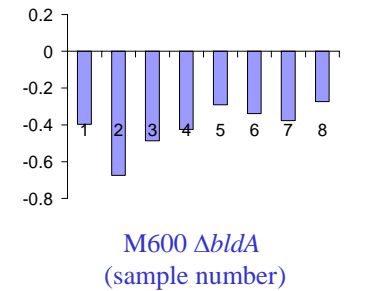

Profiles are the average of triplicate experiments

Normalized log<sub>2</sub> transcript abundance

SCO6362

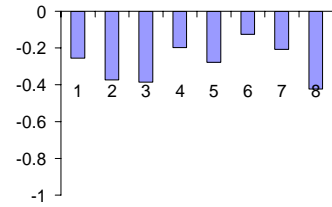

M600  
(sample number)

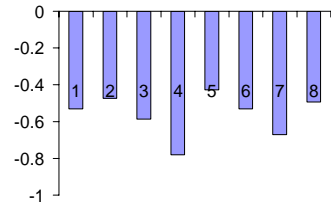

M600  $\Delta bldA$   
(sample number)

Normalized log<sub>2</sub> transcript abundance

SCO6637

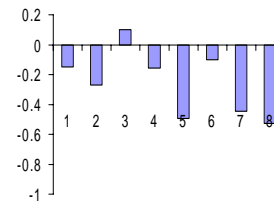

M600  
(sample number)

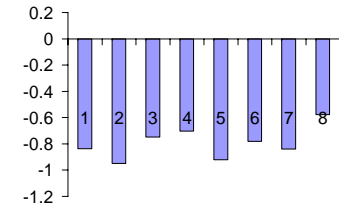

M600  $\Delta bldA$   
(sample number)

Normalized log<sub>2</sub> transcript abundance

SCO6638

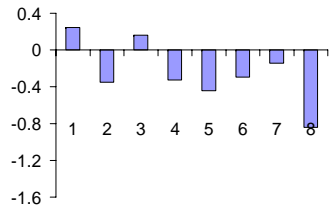

M600  
(sample number)

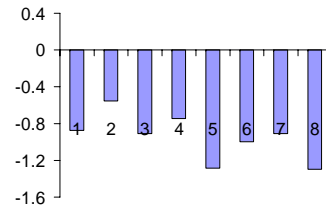

M600  $\Delta bldA$   
(sample number)

Normalized log<sub>2</sub> transcript abundance

SCO6808

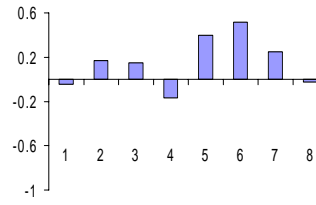

M600  
(sample number)

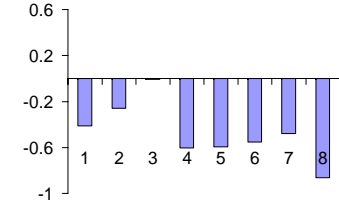

M600  $\Delta bldA$   
(sample number)

Normalized log<sub>2</sub> transcript abundance

SCO6958

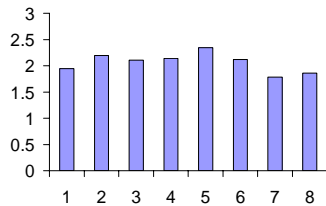

M600  
(sample number)

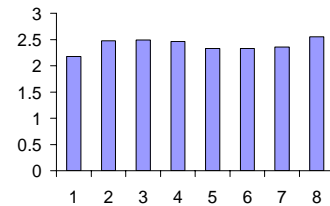

M600  $\Delta bldA$   
(sample number)

Normalized log<sub>2</sub> transcript abundance

SCO7510

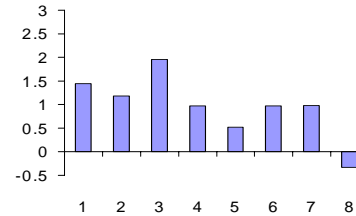

M600  
(sample number)

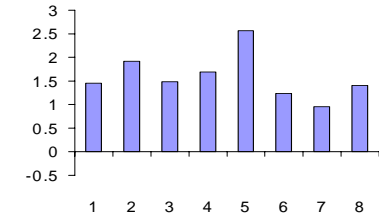

M600  $\Delta bldA$   
(sample number)

Profiles are the average of triplicate experiments

### SCO7511

Normalized log<sub>2</sub> transcript abundance

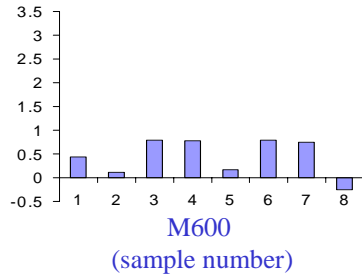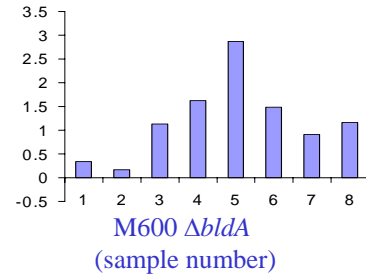

### SCO7657

Normalized log<sub>2</sub> transcript abundance

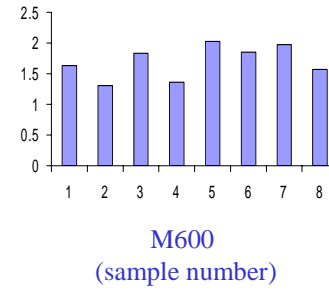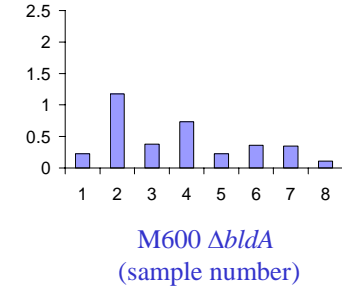

Profiles are the average of triplicate experiments
