# Supplementary material for: New pleiotropic effects of eliminating a rare tRNA from Streptomyces coelicolor, revealed by combined proteomic and transcriptomic analysis of liquid cultures
Source: PubMed Central journal article supplement (PMC2000904; doi:10.1186/1471-2164-8-261), 2007-08-02
Supplement: 1471-2164-8-261-S2.pdf [file 1471-2164-8-261-S2.pdf]

Additional File 2.

Comparison of transcription profiles determined for SCO4295, SCO5013, SCO6808, SCO7657, SCO3088, SCO3285, SCO3286, SCO5166, SCO6958, SCO6638, SCO4660, SCO4702 and SCO4648 of replicate 3 using either a) Q-RT-PCR, or B) DNA microarrays.

# 1) Expression of SCO4295

## a) Q-RT-PCR

SCO4295 QRT-PCR

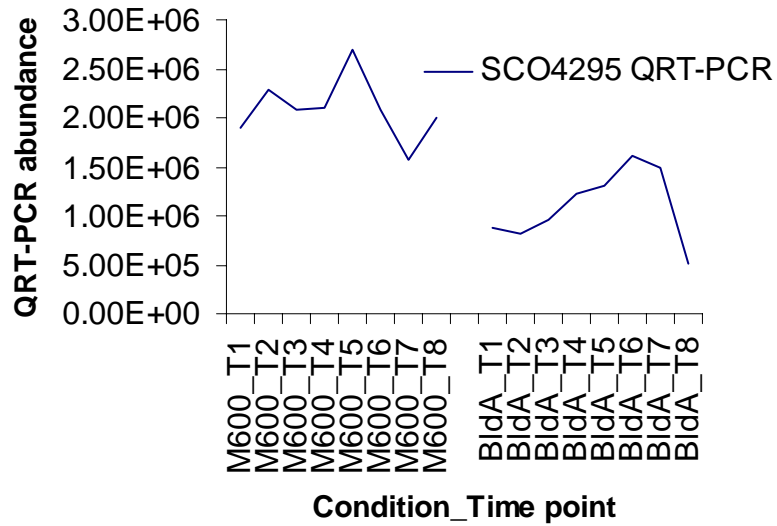

## b) DNA microarrays

SCO4295 Microarray

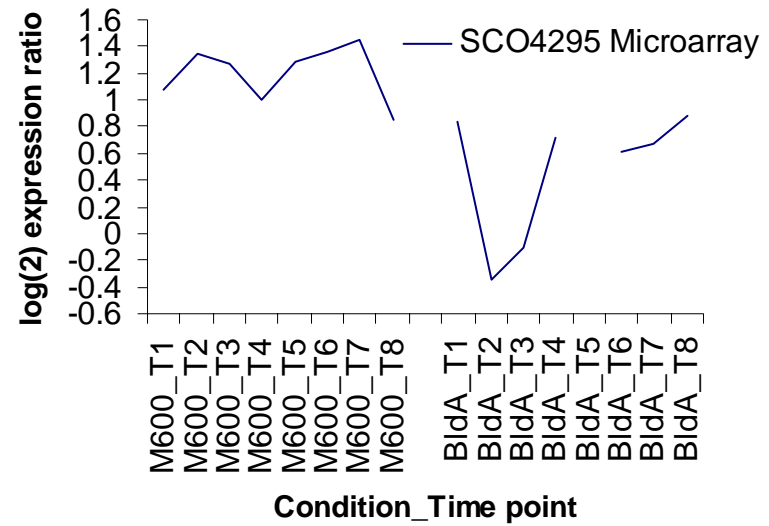

Spearman Correlation coefficient of 0.64 between the two profiles

All 16 RNA samples from one of the three time-course experiments (set C) were analysed.

## 2) Expression of SCO5013

### a) Q-RT-PCR

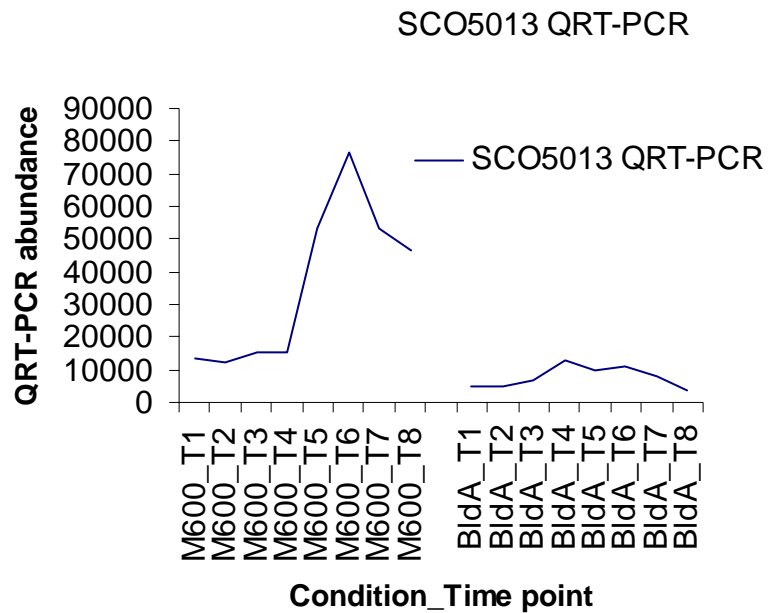

### b) DNA microarrays

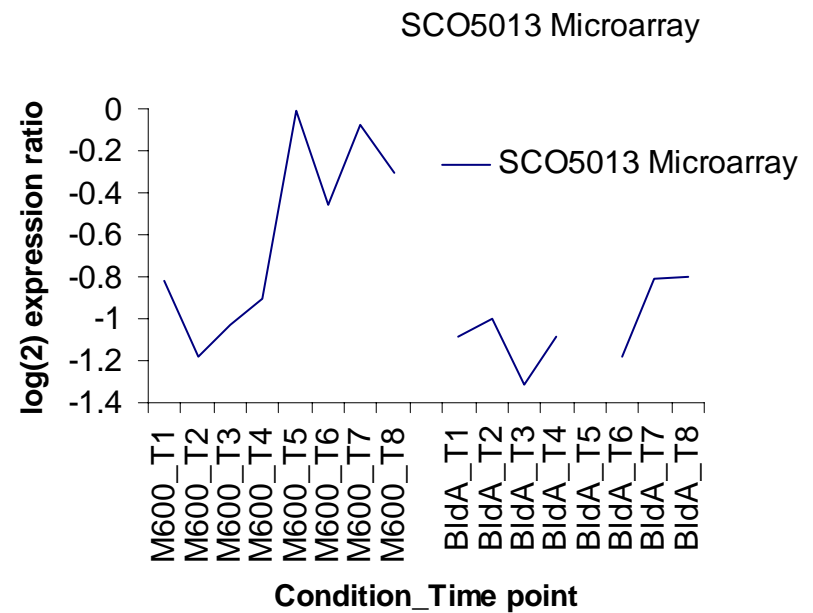

Spearman Correlation coefficient of 0.55 between the two profiles

All 16 RNA samples from one of the three time-course experiments (set C) were analysed.

### 3) Expression of SCO6808

#### a) Q-RT-PCR

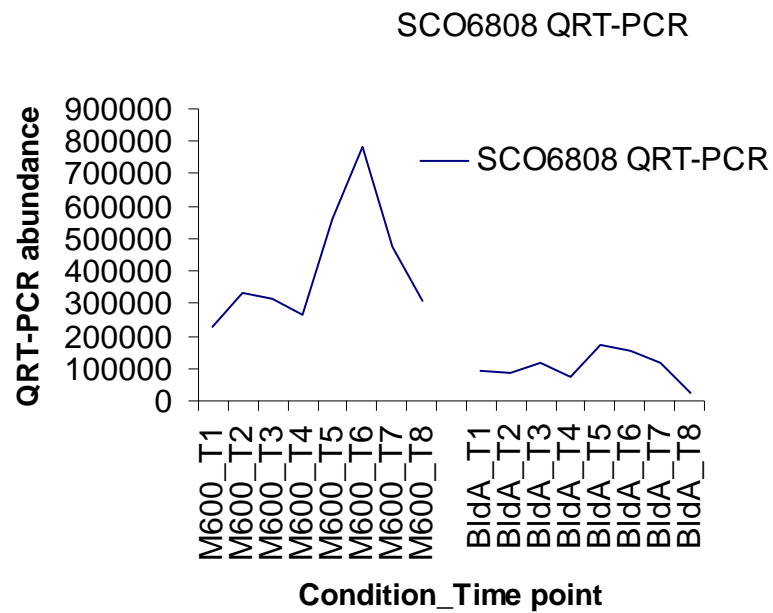

#### b) DNA microarrays

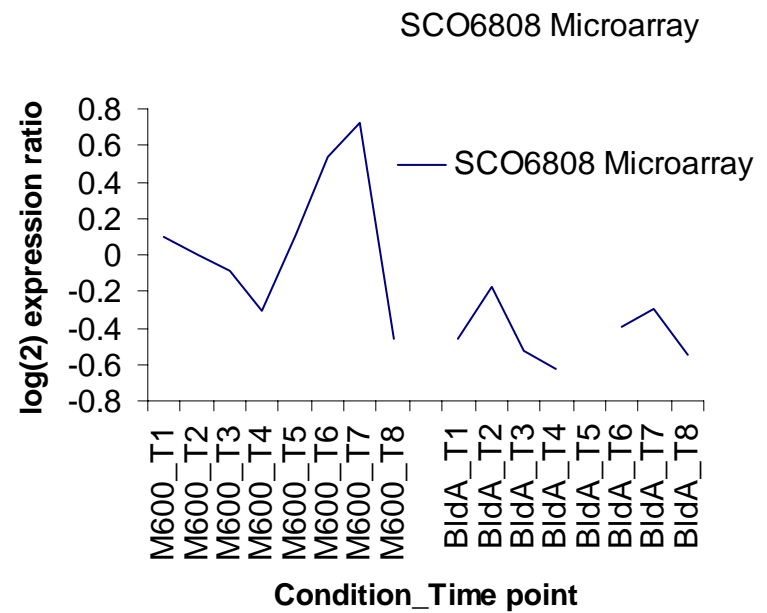

Spearman Correlation coefficient of 0.78 between the two profiles

All 16 RNA samples from one of the three time-course experiments (set C) were analysed.

#### 4) Expression of SCO7657

##### a) Q-RT-PCR

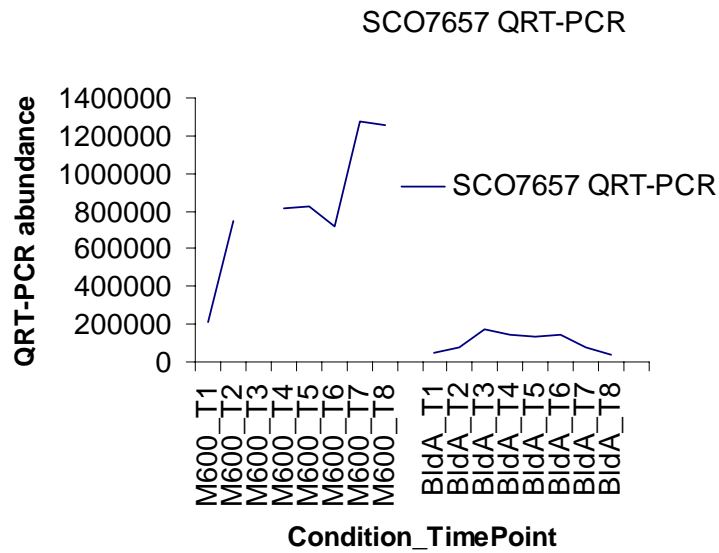

##### b) DNA microarrays

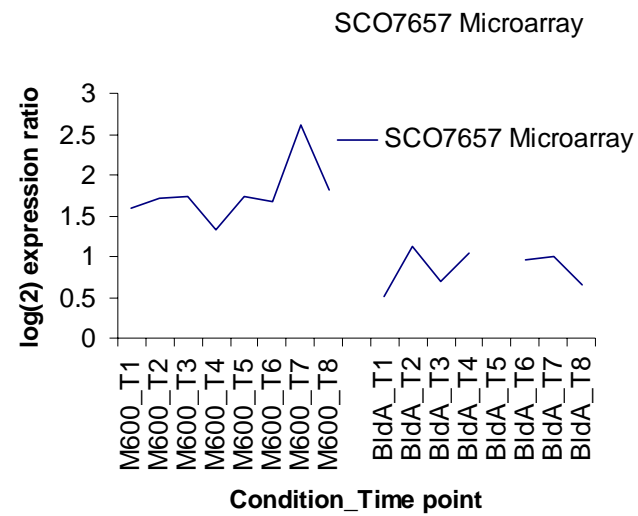

Spearman Correlation coefficient of 0.89 between the two profiles

All 16 RNA samples from one of the three time-course experiments (set C) were analysed.

# Expression of SCO 3088

## a) Q-RT-PCR

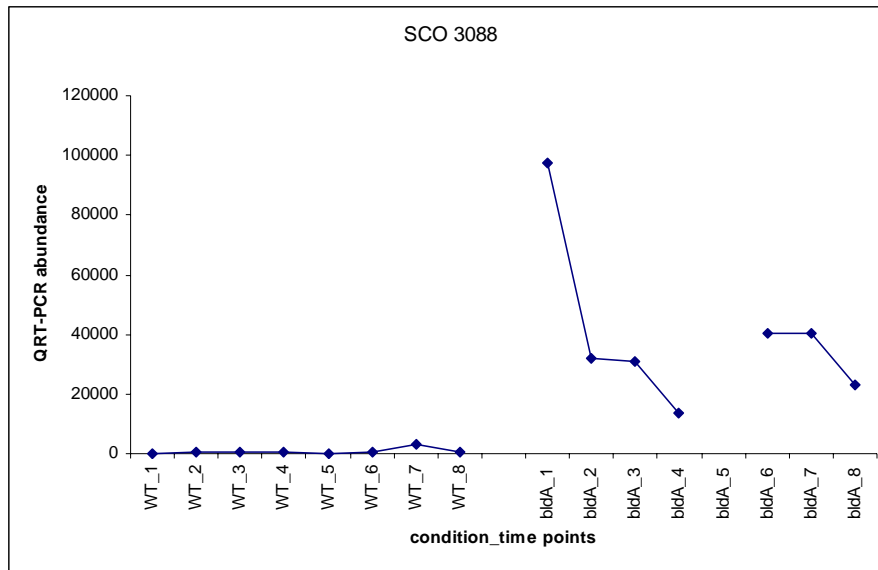

## b) DNA microarray

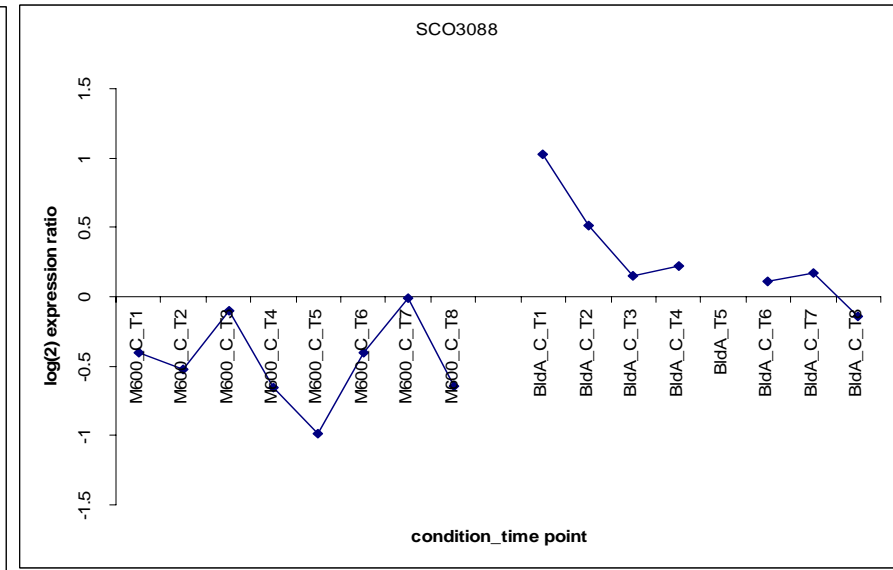

Spearman Correlation coefficient of 0.86 between the two profiles

All 16 RNA samples from one of the three time-course experiments (set C) were analysed.

# Expression of SCO 3286

## a) Q-RT-PCR

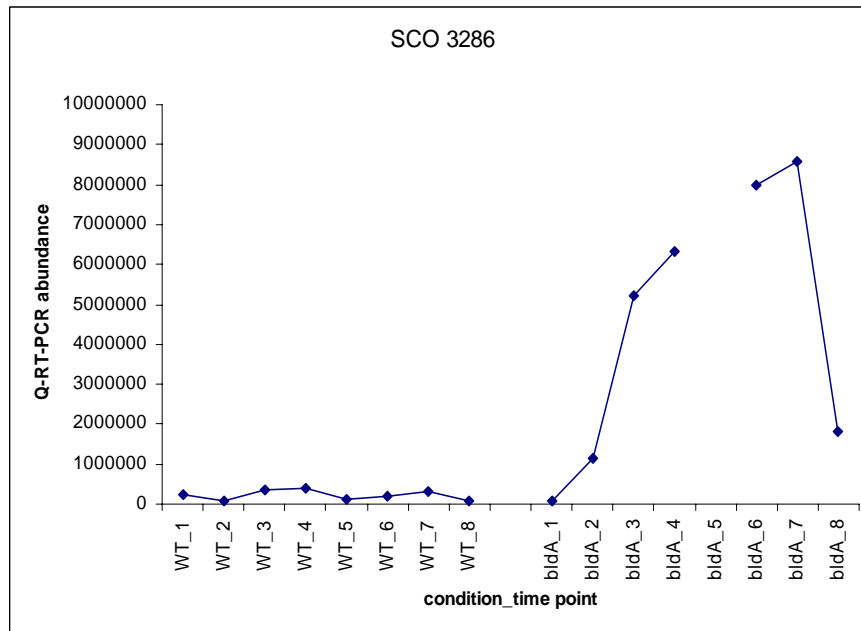

## b) DNA microarray

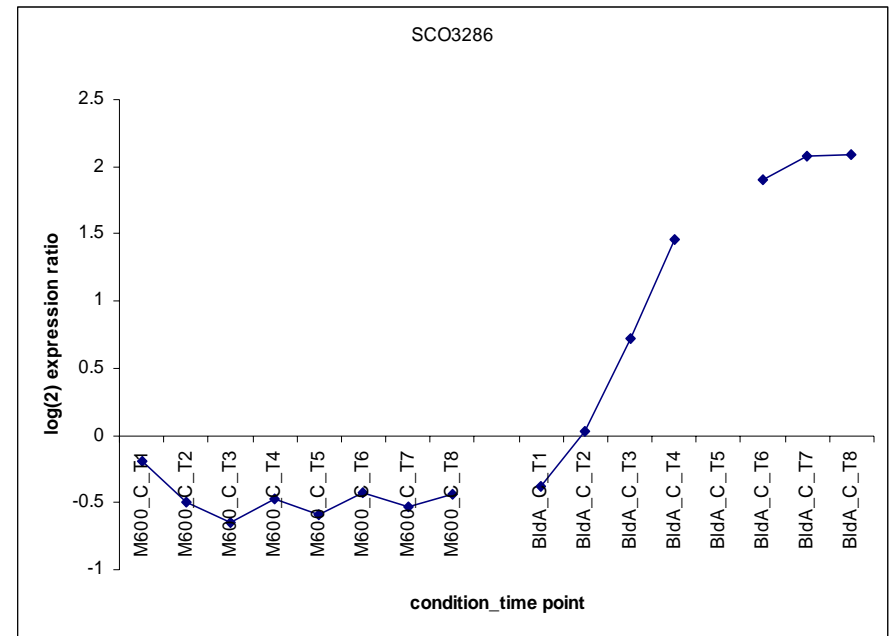

Spearman Correlation coefficient of 0.67 between the two profiles

All 16 RNA samples from one of the three time-course experiments (set C) were analysed.

# Expression of SCO 4648

## a) Q-RT-PCR

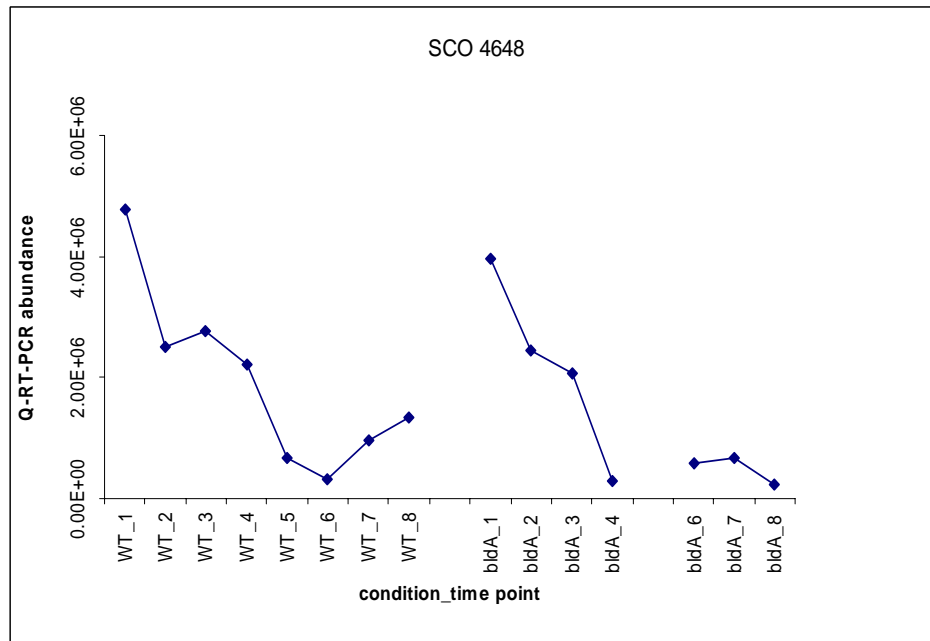

## b) DNA microarray

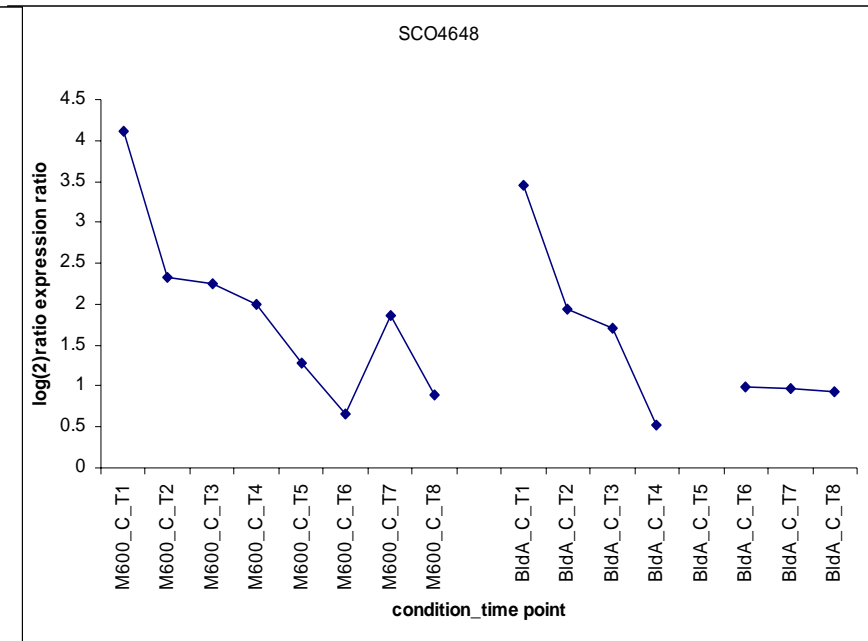

Spearman Correlation coefficient of 0.91 between the two profiles

All 16 RNA samples from one of the three time-course experiments (set C) were analysed.



# Expression of SCO 4660

## a) Q-RT-PCR

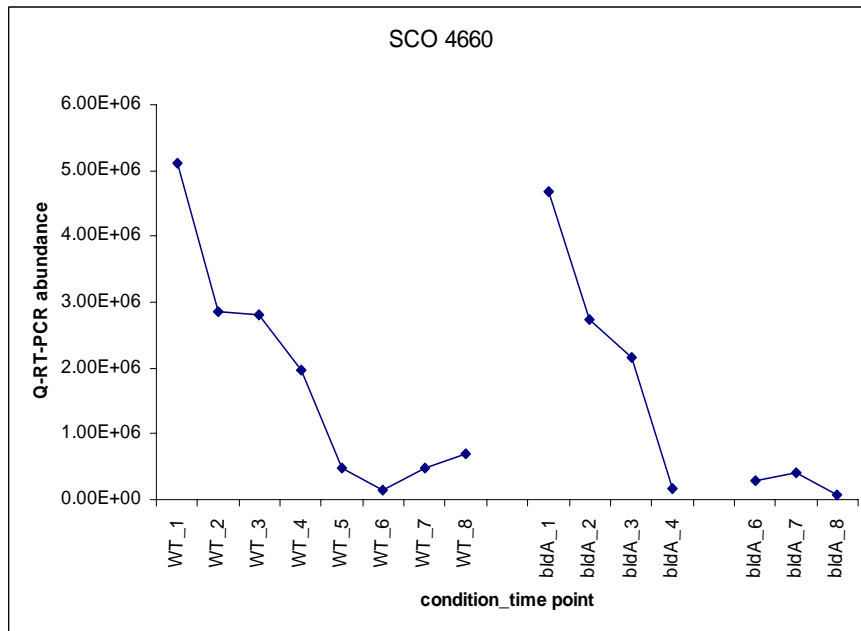

## b) DNA microarray

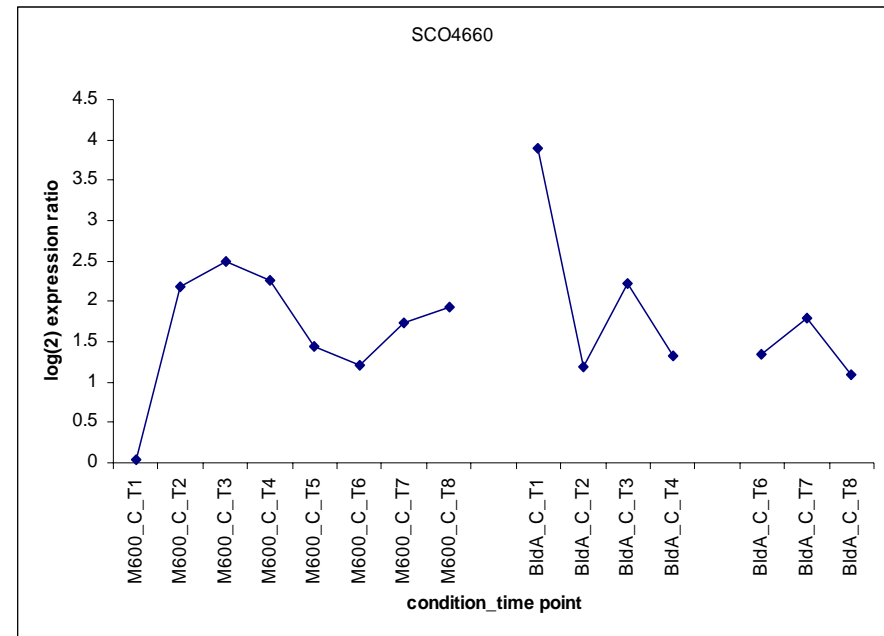

Spearman Correlation coefficient of 0.42 between the two profiles

All 16 RNA samples from one of the three time-course experiments (set C) were analysed.

# Expression of SCO 4702

## a) Q-RT-PCR

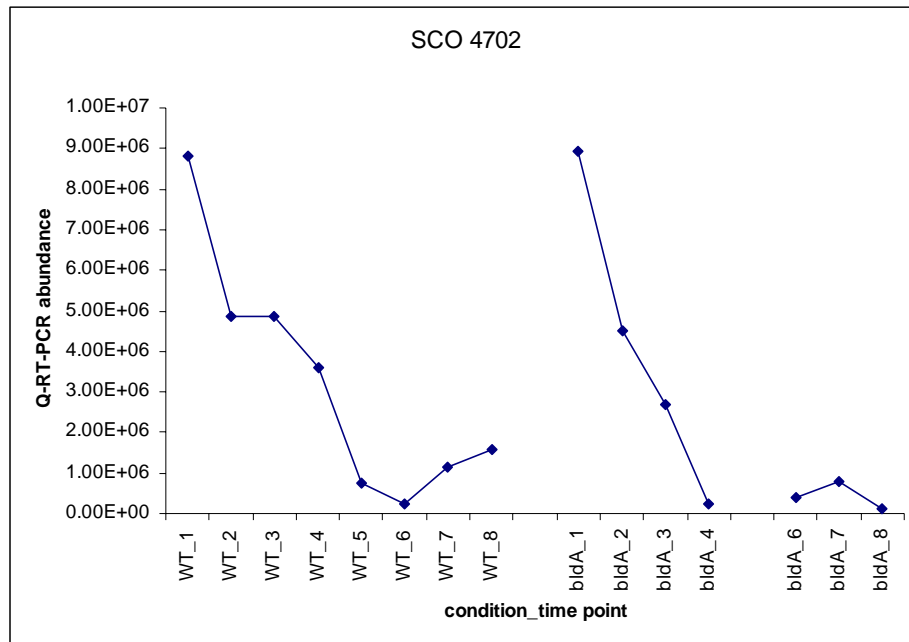

## b) DNA microarray

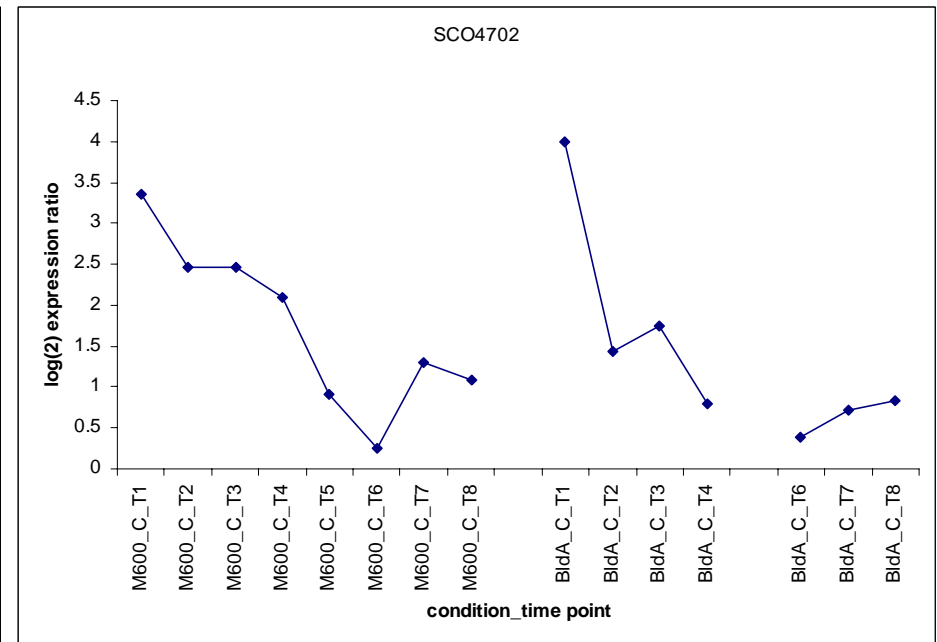

Spearman Correlation coefficient of 0.928 between the two profiles

All 16 RNA samples from one of the three time-course experiments (set C) were analysed.

# Expression of SCO 4717

## a) Q-RT-PCR

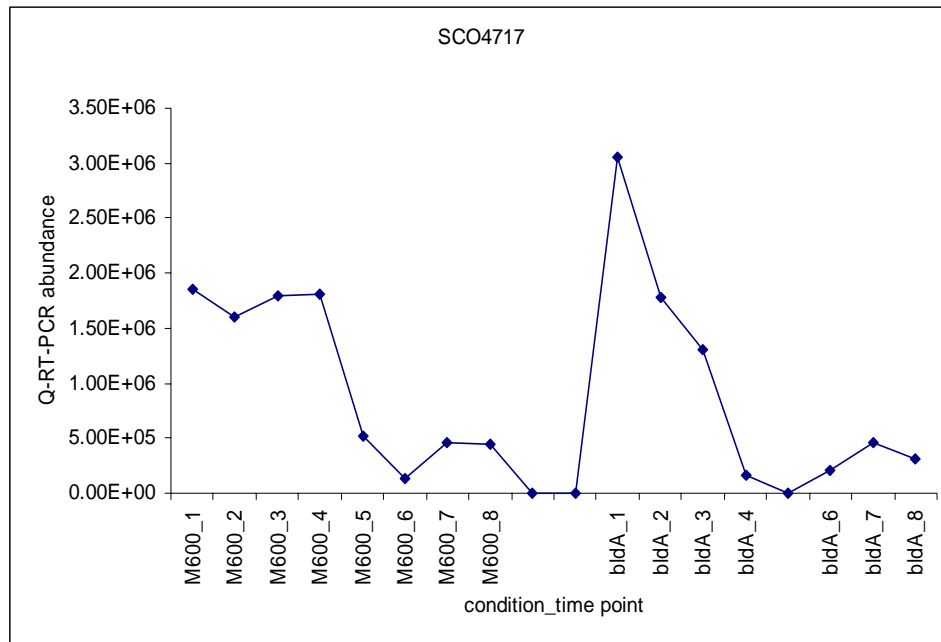

## b) DNA microarray

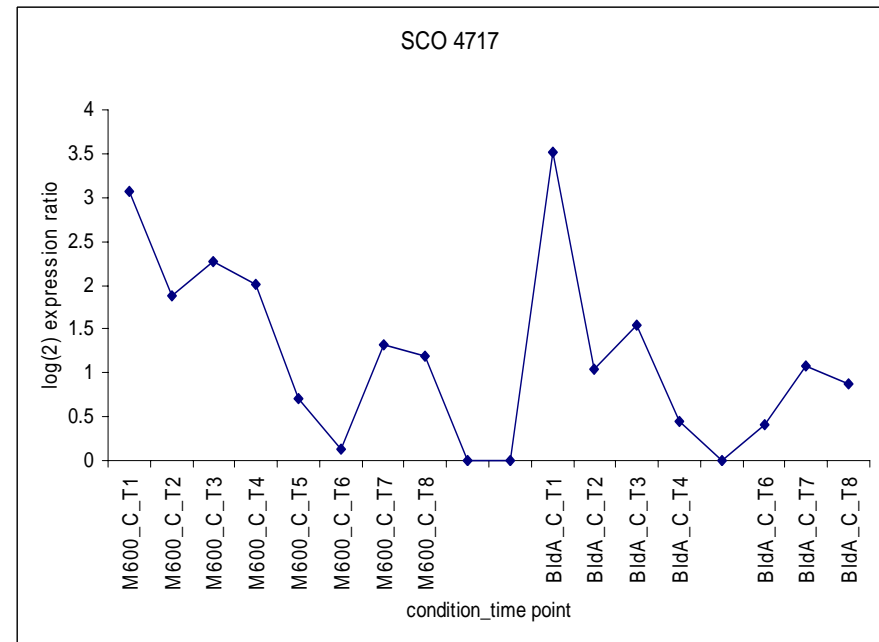

Spearman Correlation coefficient of 0.88 between the two profiles

All 16 RNA samples from one of the three time-course experiments (set C) were analysed.

# Expression of SCO 5166

## a) Q-RT-PCR

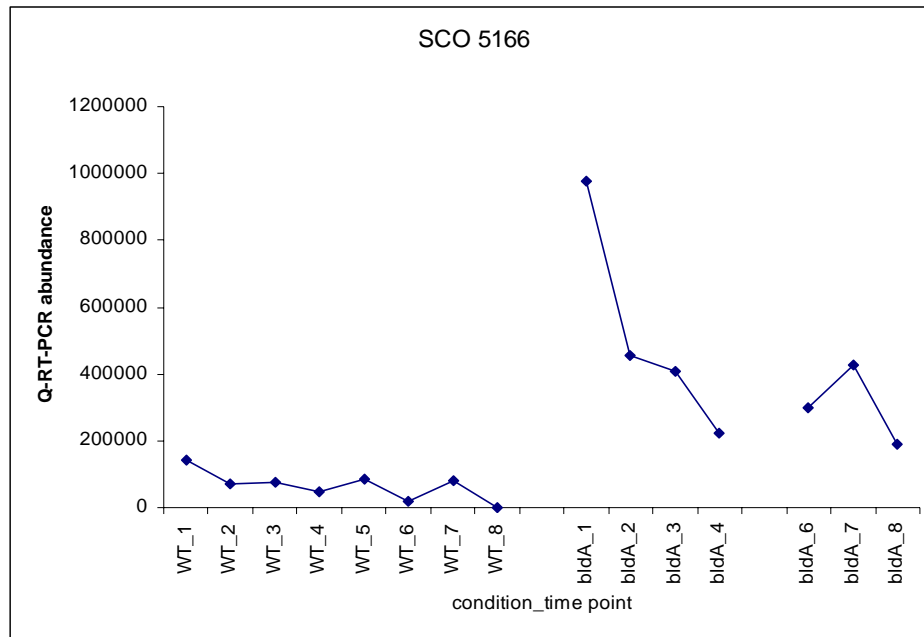

## b) DNA microarray

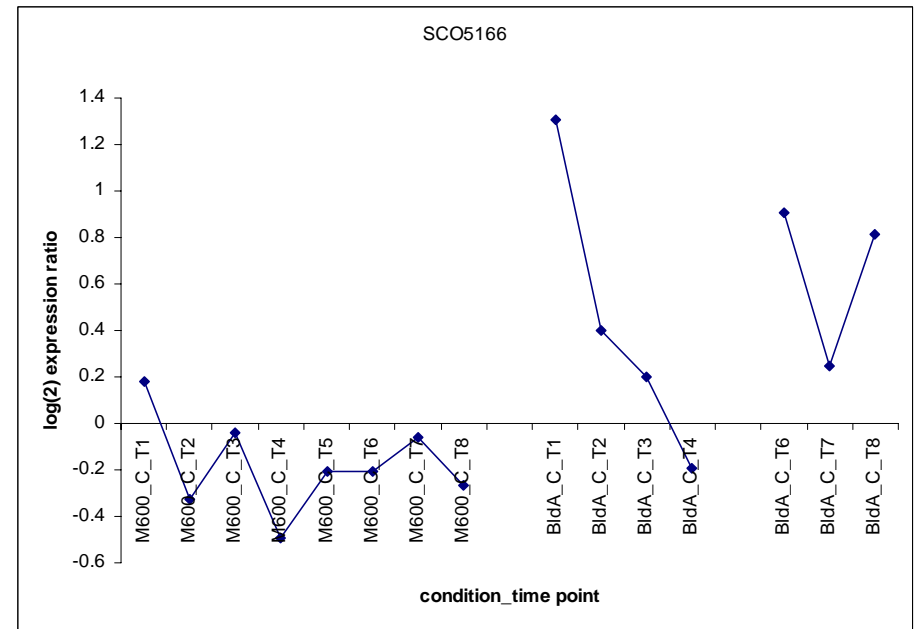

Spearman Correlation coefficient of 0.83 between the two profiles

All 16 RNA samples from one of the three time-course experiments (set C) were analysed.

# Expression of SCO 6638

## a) Q-RT-PCR

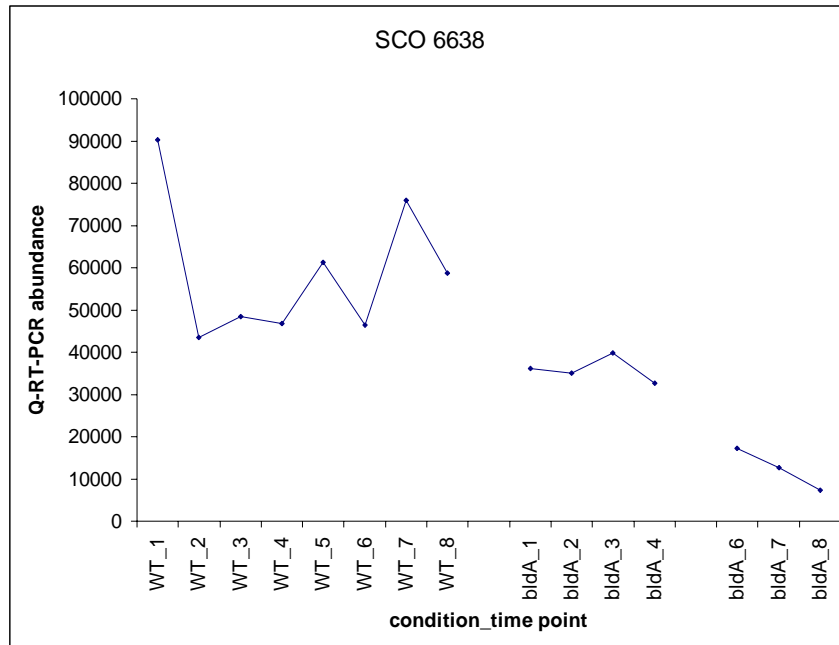

## b) DNA microarray

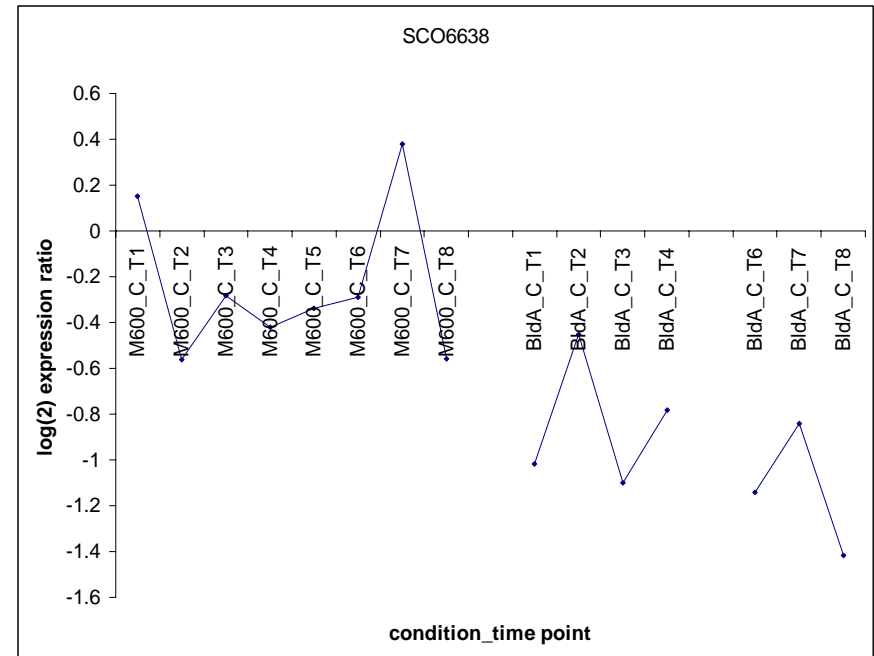

Spearman Correlation coefficient of 0.846 between the two profiles

All 16 RNA samples from one of the three time-course experiments (set C) were analysed.

# Expression of SCO 6958

## a) Q-RT-PCR

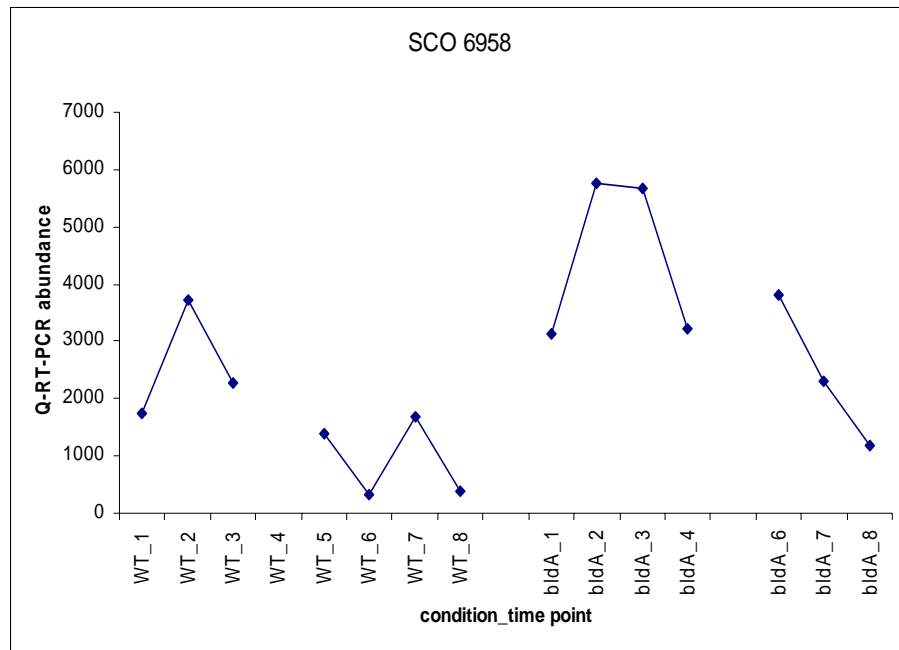

## b) DNA microarray

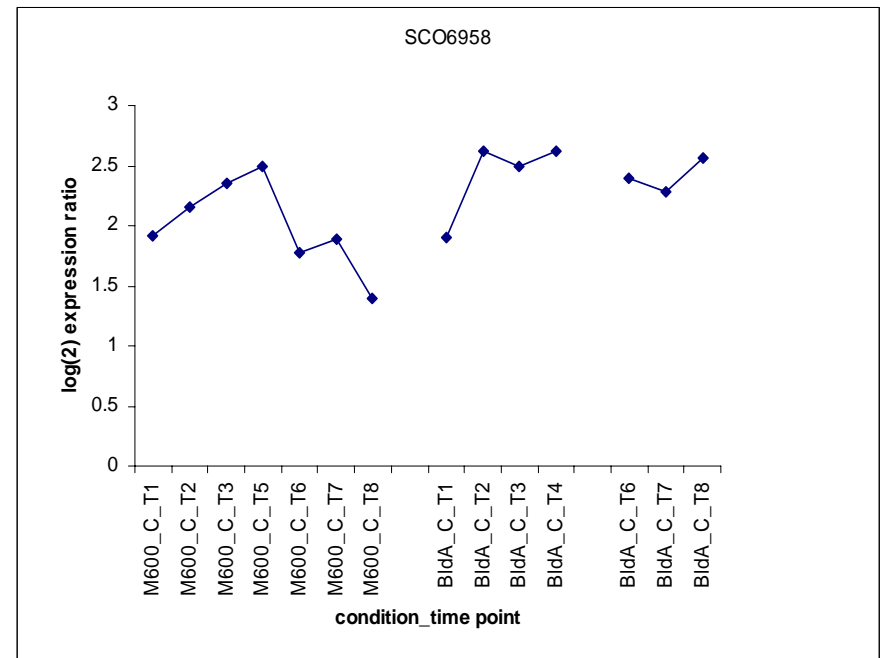

Spearman Correlation coefficient of 0.547 between the two profiles

All 16 RNA samples from one of the three time-course experiments (set C) were analysed.  
In the Q-RT-PCR, WT T4 was undetected

# Expression of SCO 3285

## a) Q-RT-PCR

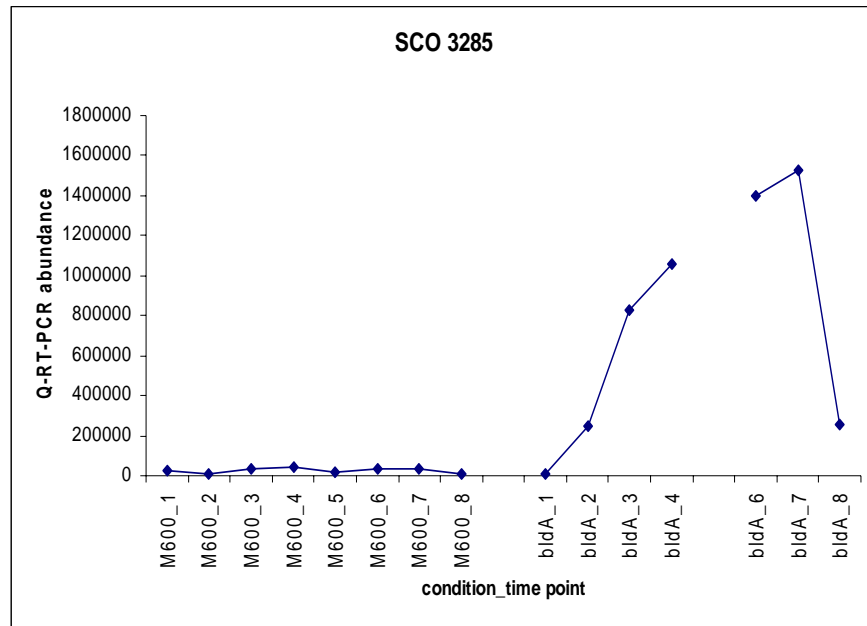

## b) DNA microarray

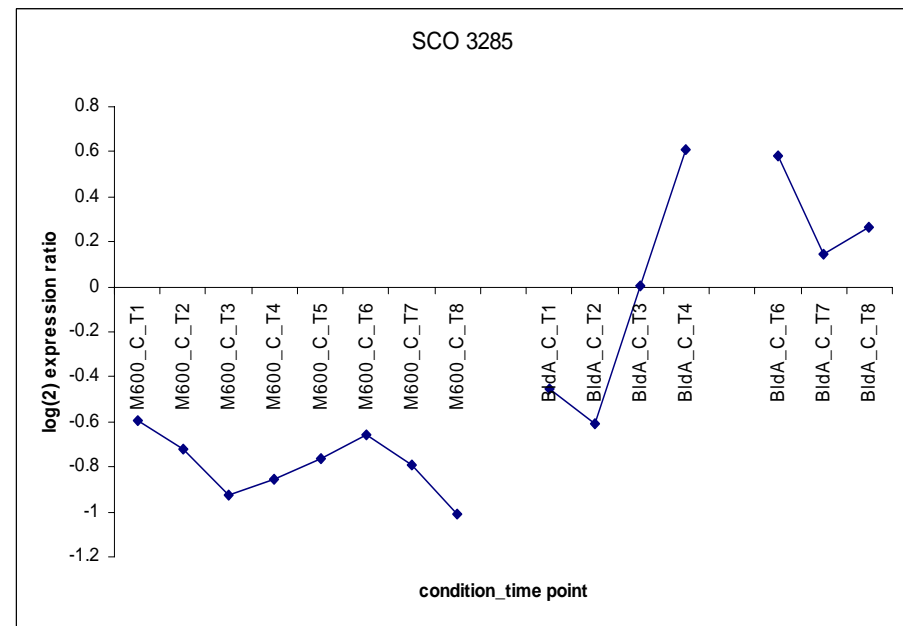

Spearman Correlation coefficient of 0.68 between the two profiles

All 16 RNA samples from one of the three time-course experiments (set C) were analysed.
