# Supplementary material for: New pleiotropic effects of eliminating a rare tRNA from Streptomyces coelicolor, revealed by combined proteomic and transcriptomic analysis of liquid cultures
Source: PubMed Central journal article supplement (PMC2000904; doi:10.1186/1471-2164-8-261), 2007-08-02
Supplement: 1471-2164-8-261-S9.pdf [file 1471-2164-8-261-S9.pdf]

Additional file 9.

Comparison of transcript and protein abundance profiles for the eleven genes identified by both transcriptome and proteome analyses as being differentially expressed in the  $\Delta bldA$  mutant.

# SCO0499

## Transcript

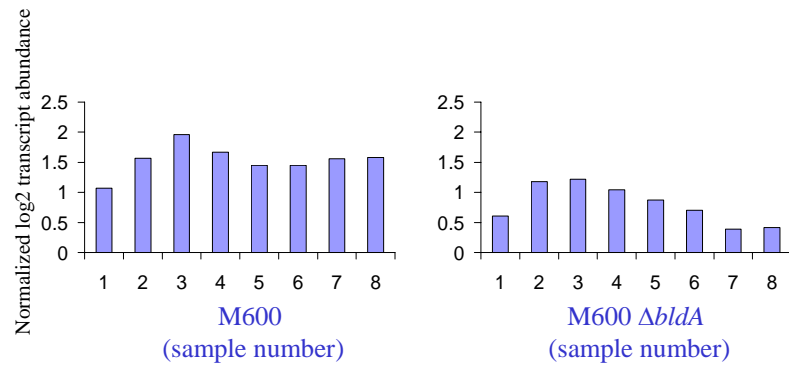

## Protein

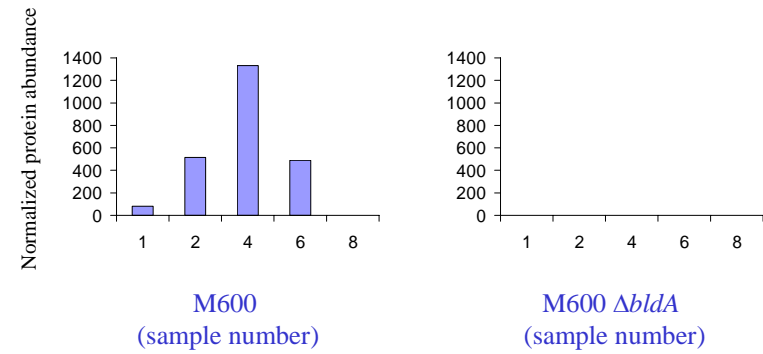

Profiles are the average of triplicate experiments for transcript abundance, and duplicate for protein abundance

# SCO3285

## Transcript

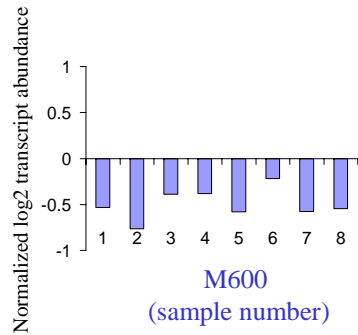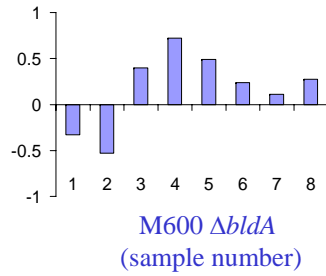

## Protein

### spot 1

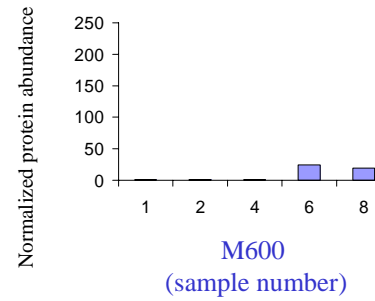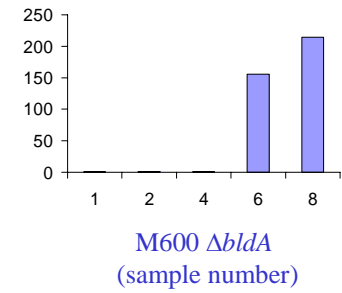

### spot 2

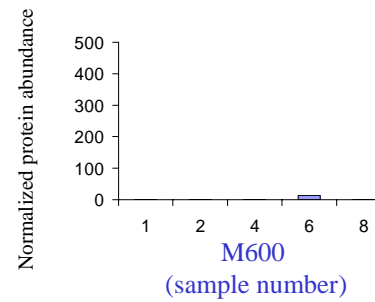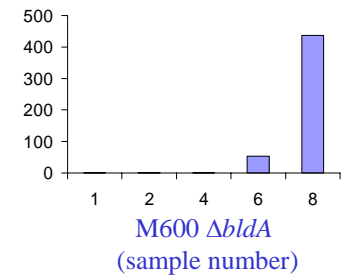

Profiles are the average of triplicate experiments for transcript abundance, and duplicate for protein abundance

# SCO4252

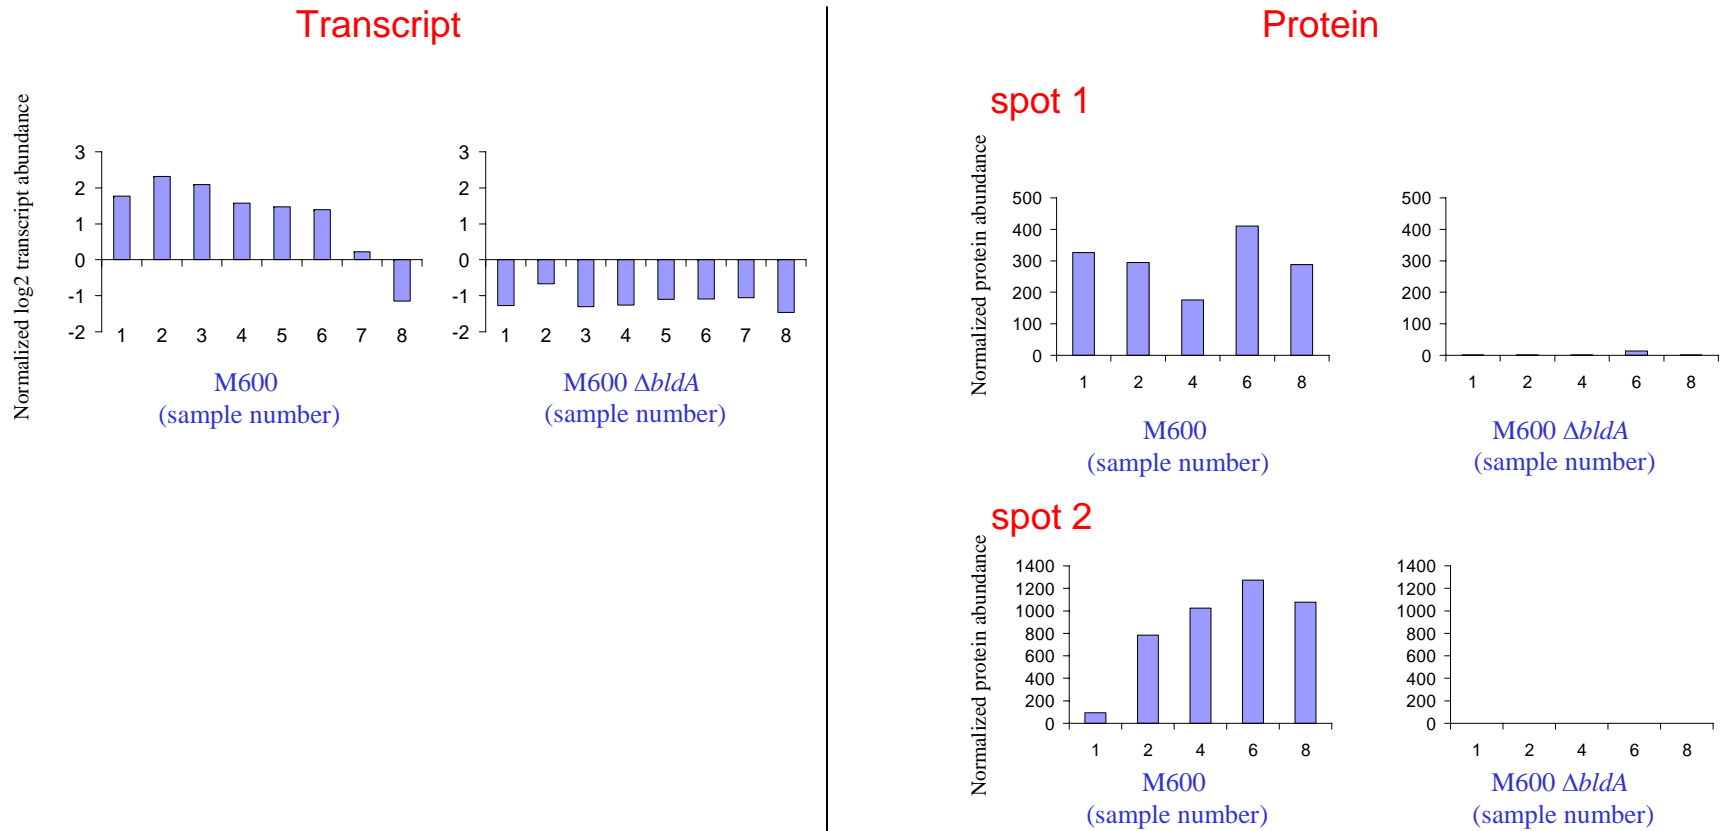

Profiles are the average of triplicate experiments for transcript abundance, and duplicate for protein abundance

# SCO4253

## Transcript

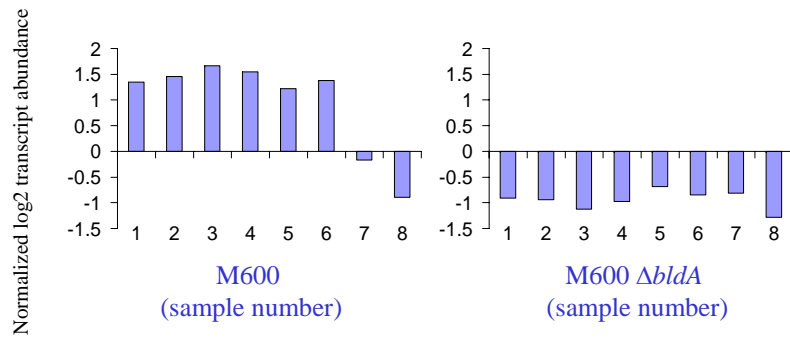

## Protein

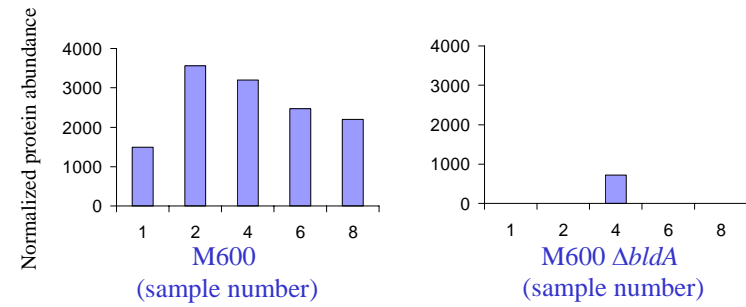

Profiles are the average of triplicate experiments for transcript abundance, and duplicate for protein abundance

# SCO4677

## Transcript

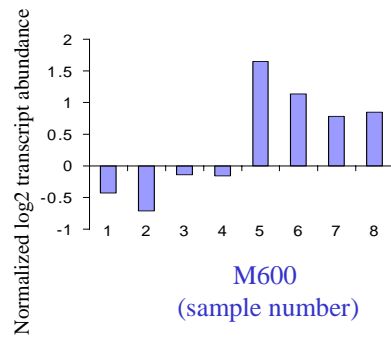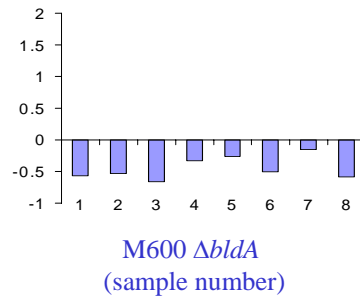

## Protein

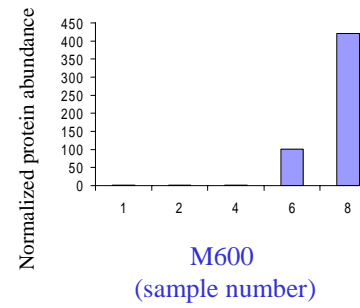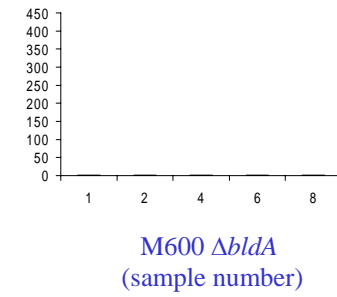

Profiles are the average of triplicate experiments for transcript abundance, and duplicate for protein abundance

# SCO4994

## Transcript

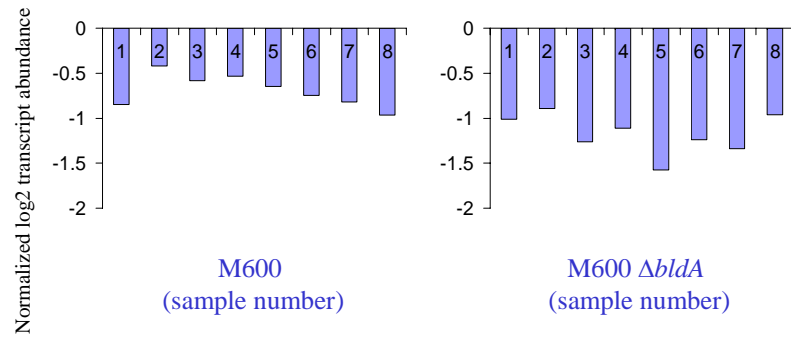

## Protein

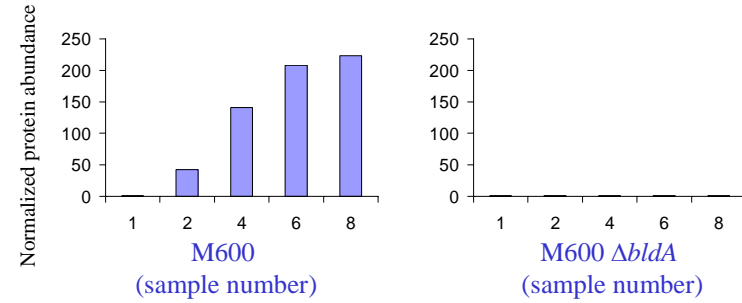

Profiles are the average of triplicate experiments for transcript abundance, and duplicate for protein abundance

# SCO5073

## Transcript

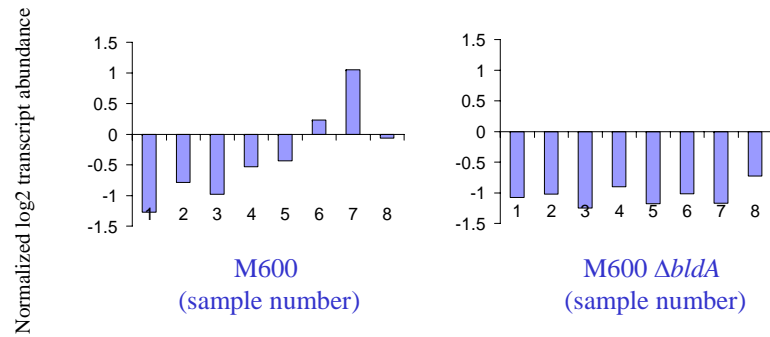

## Protein

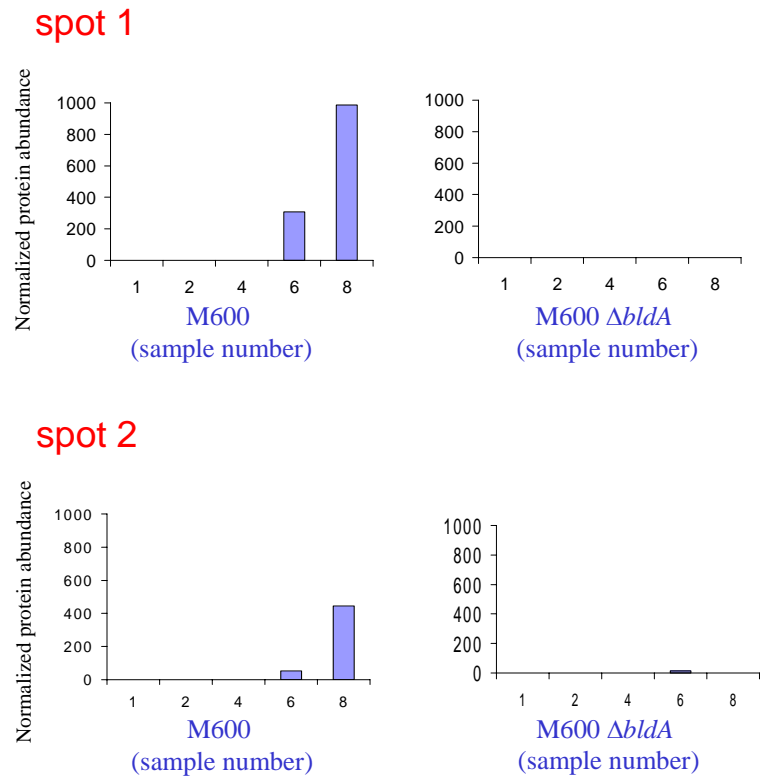

Profiles are the average of triplicate experiments for transcript abundance, and duplicate for protein abundance



# SCO5079

## Transcript

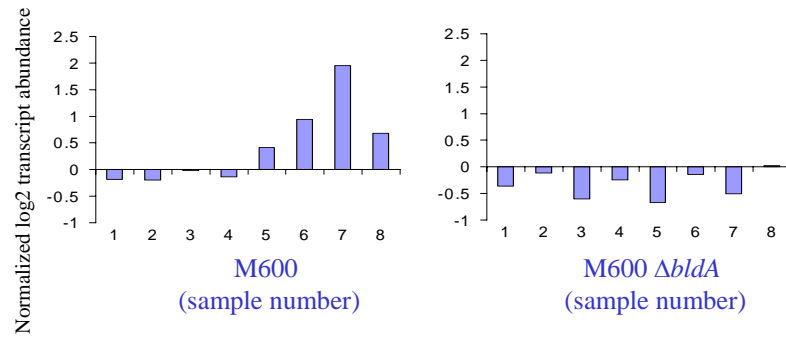

## Protein

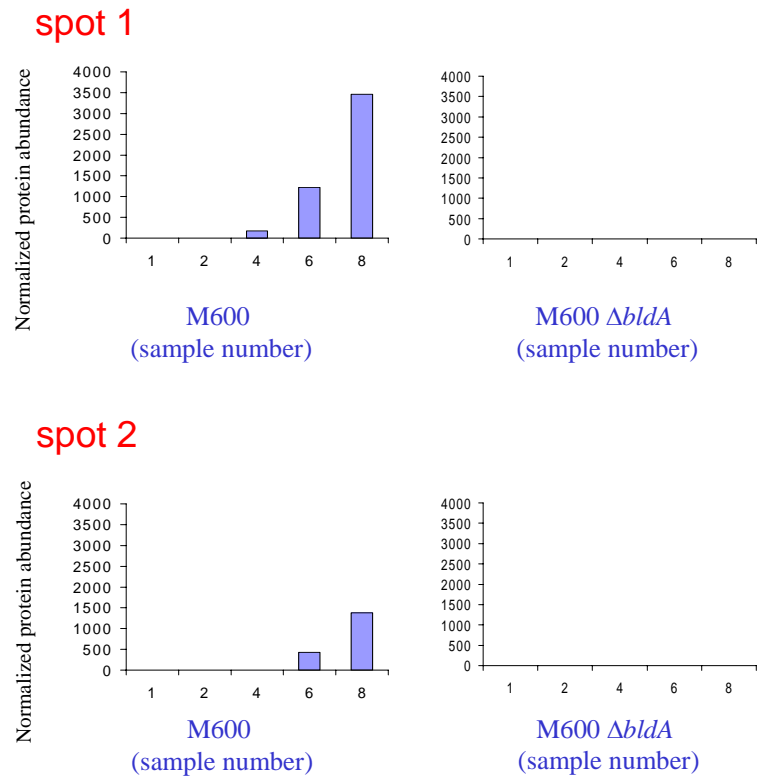

Profiles are the average of triplicate experiments for transcript abundance, and duplicate for protein abundance

# SCO6637

## Transcript

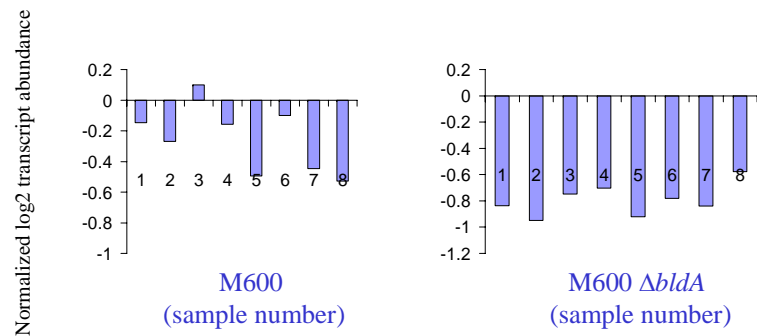

## Protein

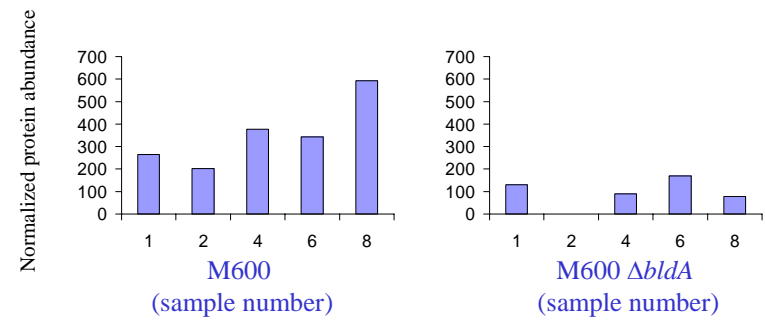

Profiles are the average of triplicate experiments for transcript abundance, and duplicate for protein abundance

# SCO6638

## Transcript

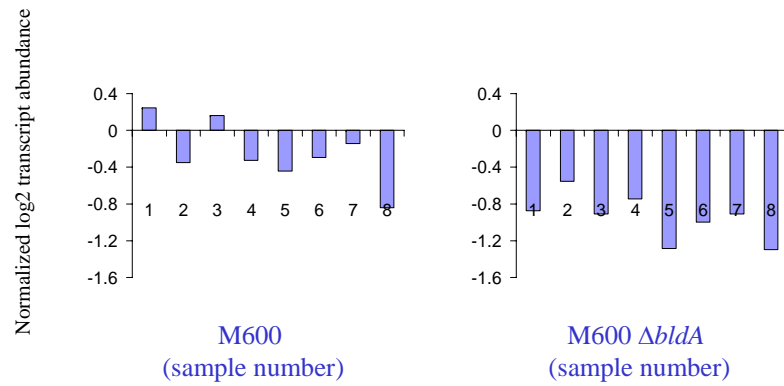

## Protein

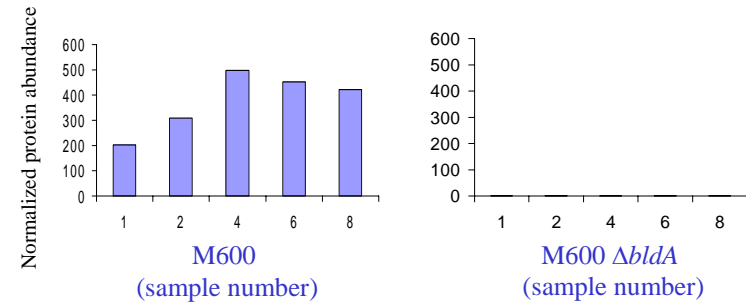

Profiles are the average of triplicate experiments for transcript abundance, and duplicate for protein abundance

# SCO7511

## Transcript

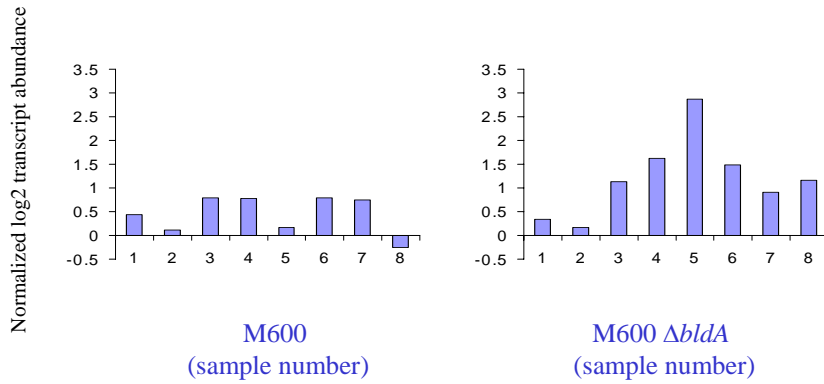

## Protein

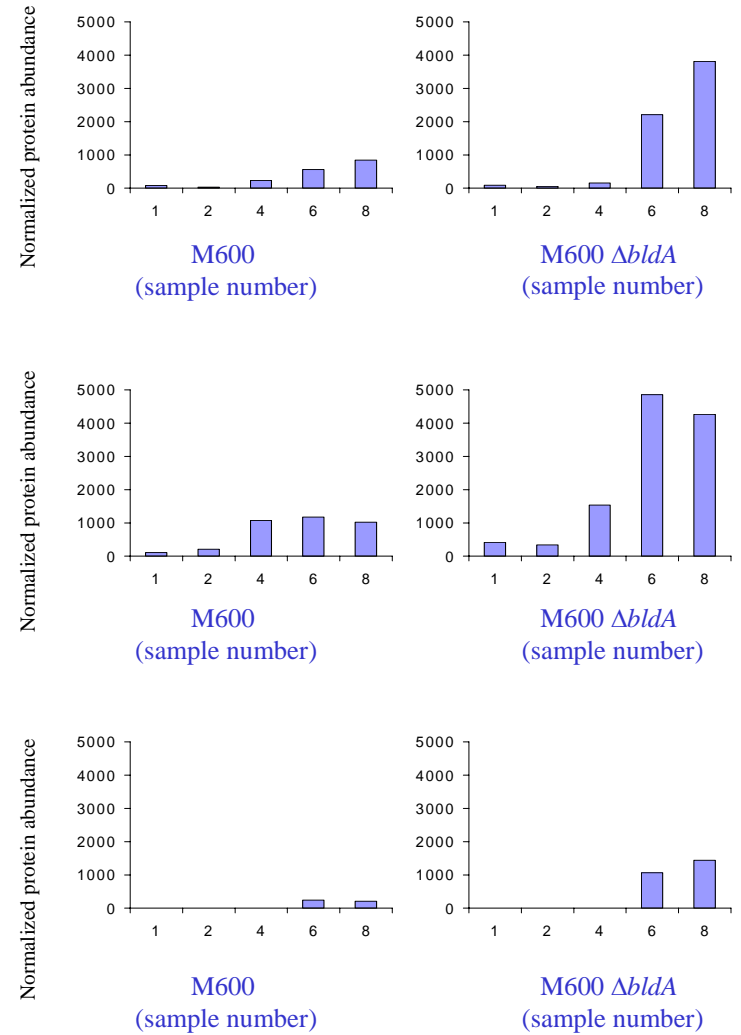

Profiles are the average of triplicate experiments for transcript abundance, and duplicate for protein abundance
